# Supplementary material for: Risks and Returns of Cryptocurrency
Source: Oxford University Press journal article supplement (doi:10.1093/rfs/hhaa113), 2020-09-13
Supplement: hhaa113_supplementary_data.pdf [file hhaa113_supplementary_data.pdf]

# Online Appendix of “Risks and Returns of Cryptocurrency” by Yukun Liu and Aleh Tsyvinski

**Figure A.1: Standard Deviation of Coin Market Returns**

This figure plots the standard deviation of the coin market returns over time. The standard deviation of the coin market returns are calculated each month.

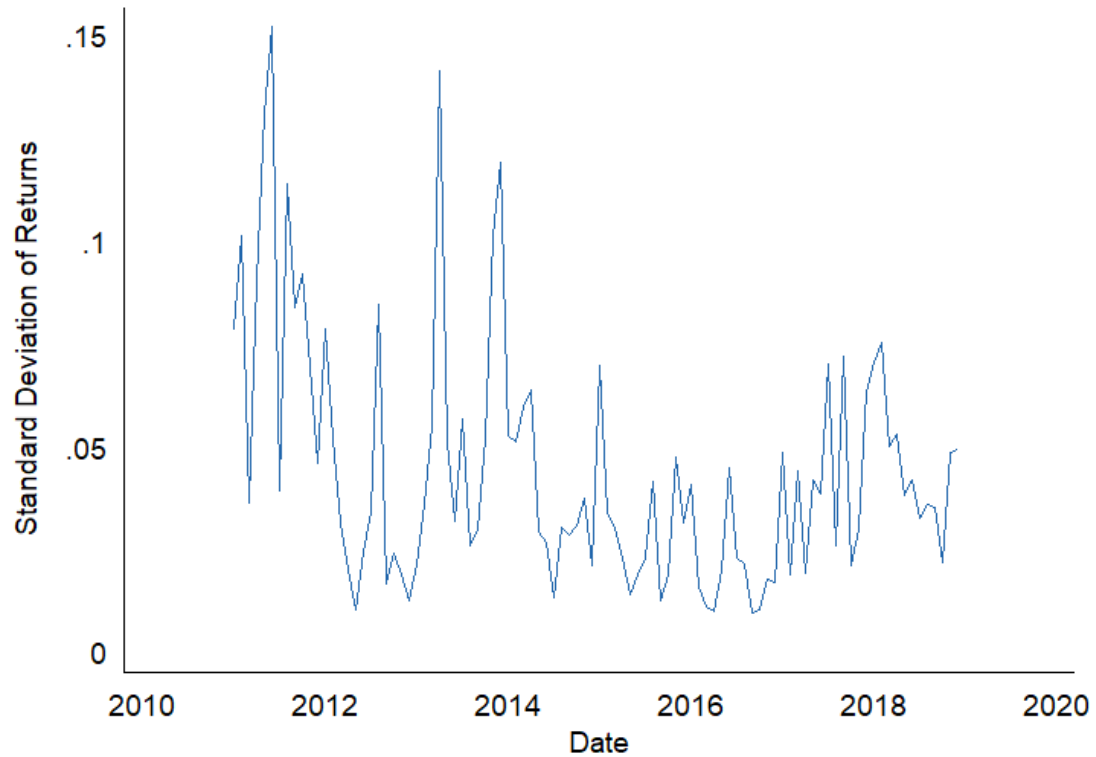

Figure A.2: Impulse Response Function

This table reports the impulse response function using coin market return and different network factors including the wallet user growth, active address growth, and transaction count growth factors. The VAR model is estimated with one lag. The models are in non-structural form. The graphs report the non-cumulative reponses. For each panel, the first row shows the effect of a one-standard-deviation impulse to the coin market return equation and the second row shows the effect of a one-standard-deviation impulse to the network growth equation. The impulse response function plots the responses up to 20 weeks.

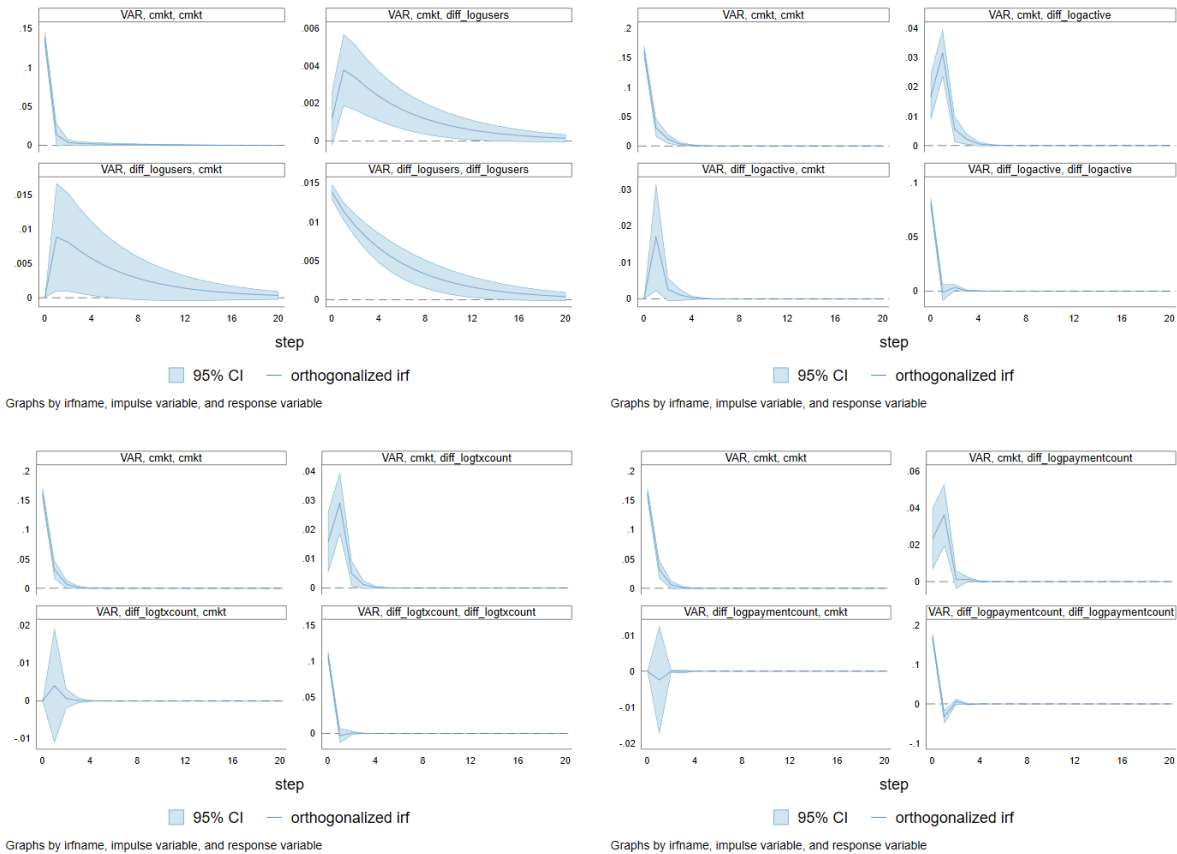

**Table A.1: Return Summary Statistics by Day of the Week**

This table shows the mean, standard deviation, t-statistics, and Sharpe ratio of the coin market index returns based on the day of week. The corresponding results for the stock market returns, Bitcoin returns, Ethereum returns, Ripple returns based on the day of week are also reported for comparison.

| CMKT      | Mean   | SD     | T-Statistics | Sharpe | Stock     | Mean   | SD    | T-Statistics | Sharpe |
|-----------|--------|--------|--------------|--------|-----------|--------|-------|--------------|--------|
| Monday    | 0.53%  | 5.54%  | 1.96         | 0.10   | Monday    | -0.04% | 1.00% | -0.70        | -0.04  |
| Tuesday   | 0.91%  | 6.07%  | 3.06         | 0.15   | Tuesday   | 0.11%  | 0.90% | 2.44         | 0.12   |
| Wednesday | 0.43%  | 5.47%  | 1.62         | 0.08   | Wednesday | 0.05%  | 0.98% | 1.08         | 0.05   |
| Thursday  | 0.47%  | 5.74%  | 1.67         | 0.08   | Thursday  | 0.06%  | 0.96% | 1.26         | 0.06   |
| Friday    | 0.35%  | 5.63%  | 1.29         | 0.06   | Friday    | 0.04%  | 0.88% | 0.94         | 0.05   |
| Saturday  | 0.28%  | 5.19%  | 1.08         | 0.05   |           |        |       |              |        |
| Sunday    | 0.28%  | 4.41%  | 1.29         | 0.06   |           |        |       |              |        |
| Bitcoin   | Mean   | SD     | T-Statistics | Sharpe | Ethereum  | Mean   | SD    | T-Statistics | Sharpe |
| Monday    | 0.64%  | 5.44%  | 2.42         | 0.12   | Monday    | 0.09%  | 7.20% | 0.16         | 0.01   |
| Tuesday   | 0.92%  | 6.00%  | 3.13         | 0.15   | Tuesday   | 1.13%  | 8.40% | 1.78         | 0.13   |
| Wednesday | 0.41%  | 5.47%  | 1.51         | 0.07   | Wednesday | 0.49%  | 6.66% | 0.98         | 0.07   |
| Thursday  | 0.50%  | 5.78%  | 1.76         | 0.09   | Thursday  | 1.31%  | 8.46% | 2.06         | 0.15   |
| Friday    | 0.30%  | 5.61%  | 1.11         | 0.05   | Friday    | 0.20%  | 6.59% | 0.41         | 0.03   |
| Saturday  | 0.29%  | 5.22%  | 1.12         | 0.06   | Saturday  | 0.25%  | 8.23% | 0.40         | 0.03   |
| Sunday    | 0.23%  | 4.39%  | 1.07         | 0.05   | Sunday    | 0.74%  | 5.75% | 1.71         | 0.13   |
| Ripple    | Mean   | SD     | T-Statistics | Sharpe |           |        |       |              |        |
| Monday    | 0.02%  | 7.55%  | 0.05         | 0.00   |           |        |       |              |        |
| Tuesday   | 0.72%  | 8.78%  | 1.38         | 0.08   |           |        |       |              |        |
| Wednesday | 0.30%  | 6.68%  | 0.74         | 0.04   |           |        |       |              |        |
| Thursday  | 1.31%  | 10.73% | 2.04         | 0.12   |           |        |       |              |        |
| Friday    | 0.96%  | 7.72%  | 2.08         | 0.12   |           |        |       |              |        |
| Saturday  | -0.15% | 7.05%  | -0.36        | -0.02  |           |        |       |              |        |
| Sunday    | 0.56%  | 12.09% | 0.77         | 0.05   |           |        |       |              |        |

**Table A.2: Extreme Events of Logged Daily CMKT Returns**

This table reports the percentage of extreme events based on the daily coin market index returns. The coin market returns start from 01/01/2011 to 12/31/2018.

| Extreme Events of Logged Daily CMKT Returns |        |            |          |        |            |
|---------------------------------------------|--------|------------|----------|--------|------------|
| Disasters                                   | Counts | Percentage | Miracles | Counts | Percentage |
| <-5%                                        | 254    | 8.70%      | >5%      | 306    | 10.48%     |
| <-10%                                       | 95     | 3.25%      | >10%     | 94     | 3.22%      |
| <-20%                                       | 18     | 0.62%      | >20%     | 22     | 0.75%      |
| <-30%                                       | 6      | 0.21%      | >30%     | 3      | 0.10%      |

**Table A.3: Production Cost**

This table reports the factor loadings of the coin market returns on the production factors using an alternative model specification. The table reports the factor loadings of the coin returns on the production factors. The standard t-statistic is reported in parentheses. \*, \*\*, \*\*\* denote significance levels at the 10%, 5%, and 1% based on the standard t-statistics. The data frequency is monthly.

|                         | (1)              | (2)              | (3)              | (4)              | (5)              | (6)              | (7)              | (8)              | (9)              | (10)             | (11)             | (12)             |
|-------------------------|------------------|------------------|------------------|------------------|------------------|------------------|------------------|------------------|------------------|------------------|------------------|------------------|
| $\Delta Gen\ Coin$      | 0.53<br>(0.87)   |                  | 0.55<br>(0.90)   | 0.50<br>(0.79)   |                  | 0.49<br>(0.78)   | 0.61<br>(0.98)   |                  | 0.63<br>(1.02)   | 0.56<br>(0.87)   |                  | 0.54<br>(0.84)   |
| $\Delta Gen\ Coin_{+1}$ |                  | 0.69<br>(1.13)   | 0.71<br>(1.15)   |                  | 0.74<br>(1.14)   | 0.73<br>(1.13)   |                  | 0.89<br>(1.43)   | 0.90<br>(1.45)   |                  | 0.98<br>(1.52)   | 0.97<br>(1.49)   |
| $\Delta fees$           | 0.36**<br>(2.46) | 0.35**<br>(2.36) | 0.34**<br>(2.31) | 0.37**<br>(2.32) | 0.35**<br>(2.21) | 0.34**<br>(2.16) |                  |                  |                  |                  |                  |                  |
| $fees$                  |                  |                  |                  |                  |                  |                  | 0.06<br>(0.89)   | 0.06<br>(0.95)   | 0.06<br>(0.98)   | 0.12<br>(1.56)   | 0.12*<br>(1.68)  | 0.12<br>(1.66)   |
| $ClosePrice$            | -0.00<br>(-0.22) | -0.00<br>(-0.23) | -0.00<br>(-0.29) | -0.00<br>(-0.18) | -0.00<br>(-0.19) | -0.00<br>(-0.25) | -0.00<br>(-0.98) | -0.00<br>(-1.02) | -0.00<br>(-1.08) | -0.00<br>(-1.23) | -0.00<br>(-1.30) | -0.00<br>(-1.33) |
| $PC^{elec}$             |                  |                  |                  | -0.02<br>(-0.46) | -0.01<br>(-0.35) | -0.01<br>(-0.30) |                  |                  |                  | -0.00<br>(-0.12) | 0.00<br>(0.00)   | 0.00<br>(0.04)   |
| $\Delta confirm$        |                  |                  |                  |                  |                  |                  |                  |                  |                  |                  |                  |                  |
| $confirm$               |                  |                  |                  |                  |                  |                  |                  |                  |                  |                  |                  |                  |
| $R^2$                   | 0.07             | 0.08             | 0.09             | 0.07             | 0.08             | 0.08             | 0.02             | 0.03             | 0.04             | 0.04             | 0.05             | 0.06             |
|                         | (13)             | (14)             | (15)             | (16)             | (17)             | (18)             | (19)             | (20)             | (21)             | (22)             | (23)             | (24)             |
| $\Delta Gen\ Coin$      | -0.14<br>(-0.22) |                  | -0.14<br>(-0.22) | -0.15<br>(-0.24) |                  | -0.16<br>(-0.24) | -0.16<br>(-0.26) |                  | -0.16<br>(-0.26) | -0.16<br>(-0.27) |                  | -0.17<br>(-0.27) |
| $\Delta Gen\ Coin_{+1}$ |                  | 0.29<br>(0.47)   | 0.29<br>(0.47)   |                  | 0.26<br>(0.42)   | 0.27<br>(0.42)   |                  | 0.43<br>(0.71)   | 0.43<br>(0.70)   |                  | 0.42<br>(0.68)   | 0.42<br>(0.68)   |
| $\Delta fees$           | 0.34*<br>(1.71)  | 0.33*<br>(1.67)  | 0.34*<br>(1.67)  | 0.36*<br>(1.77)  | 0.35*<br>(1.72)  | 0.35*<br>(1.73)  |                  |                  |                  |                  |                  |                  |
| $fees$                  |                  |                  |                  |                  |                  |                  | 0.18**<br>(2.39) | 0.18**<br>(2.38) | 0.18**<br>(2.38) | 0.18**<br>(2.38) | 0.18**<br>(2.37) | 0.18**<br>(2.37) |
| $ClosePrice$            | 0.00<br>(0.05)   | 0.00<br>(0.00)   | 0.00<br>(0.02)   | 0.00<br>(0.07)   | 0.00<br>(0.03)   | 0.00<br>(0.04)   | -0.00<br>(-1.26) | -0.00<br>(-1.32) | -0.00<br>(-1.29) | -0.00<br>(-1.27) | -0.00<br>(-1.32) | -0.00<br>(-1.29) |
| $PC^{elec}$             |                  |                  |                  | -0.02<br>(-0.62) | -0.02<br>(-0.58) | -0.02<br>(-0.59) |                  |                  |                  | -0.01<br>(-0.36) | -0.01<br>(-0.32) | -0.01<br>(-0.33) |
| $\Delta confirm$        | 0.21<br>(0.35)   | 0.21<br>(0.36)   | 0.19<br>(0.31)   | 0.22<br>(0.36)   | 0.23<br>(0.38)   | 0.20<br>(0.32)   |                  |                  |                  |                  |                  |                  |
| $confirm$               |                  |                  |                  |                  |                  |                  | -0.17<br>(-0.51) | -0.16<br>(-0.49) | -0.17<br>(-0.51) | -0.16<br>(-0.47) | -0.15<br>(-0.45) | -0.16<br>(-0.47) |
| $R^2$                   | 0.05             | 0.05             | 0.05             | 0.05             | 0.06             | 0.06             | 0.07             | 0.08             | 0.08             | 0.07             | 0.08             | 0.08             |

**Table A.4: Cryptocurrency Return Loadings to Electricity Factors – Lead-Lag**

This table reports the factor loadings of coin market returns on the production factors that relate to electricity costs. The table reports the factor loadings of the coin returns on the production factors. The standard t-statistic is reported in parentheses. \*, \*\*, \*\*\* denote significance levels at the 10%, 5%, and 1% based on the standard t-statistics. The data frequency is monthly.

|                    | $CMKT_{t+1}$ |
|--------------------|--------------|--------------|--------------|--------------|--------------|--------------|--------------|--------------|
|                    | (1)          | (2)          | (3)          | (4)          | (5)          | (6)          | (7)          | (8)          |
| $\Delta Price$ US  | -5.51*       |              |              |              |              |              |              |              |
|                    | (-1.78)      |              |              |              |              |              |              |              |
| $\Delta Gen$ US    |              | -0.59        |              |              |              |              |              |              |
|                    |              | (-0.75)      |              |              |              |              |              |              |
| $\Delta Consum$ US |              |              | -0.36        |              |              |              |              |              |
|                    |              |              | (-0.64)      |              |              |              |              |              |
| $\Delta Price$ CN  |              |              |              | -0.15        |              |              |              |              |
|                    |              |              |              | (-0.01)      |              |              |              |              |
| $\Delta Price$ SC  |              |              |              |              | 0.01         |              |              |              |
|                    |              |              |              |              | (0.00)       |              |              |              |
| $\Delta Gen$ CN    |              |              |              |              |              | 0.76         |              |              |
|                    |              |              |              |              |              | (0.83)       |              |              |
| $\Delta Gen$ SC    |              |              |              |              |              |              | -0.09        |              |
|                    |              |              |              |              |              |              | (-0.17)      |              |
| $PC^{elec}$        |              |              |              |              |              |              |              | -0.03        |
|                    |              |              |              |              |              |              |              | (-0.66)      |
| Cons               | 0.20***      | 0.20***      | 0.20***      | 0.19**       | 0.19**       | 0.19**       | 0.20***      | 0.20***      |
|                    | (2.83)       | (2.71)       | (2.69)       | (2.62)       | (2.61)       | (2.58)       | (2.64)       | (2.64)       |
| $R^2$              | 0.03         | 0.01         | 0.00         | 0.00         | 0.00         | 0.01         | 0.00         | 0.00         |

  

|              | $\Delta Price$ US | $\Delta Gen$ US | $\Delta Consum$ US | $\Delta Price$ CN | $\Delta Price$ SC | $\Delta Gen$ CN | $\Delta Gen$ SC | $PC^{elec}$ |
|--------------|-------------------|-----------------|--------------------|-------------------|-------------------|-----------------|-----------------|-------------|
|              | (1)               | (2)             | (3)                | (4)               | (5)               | (6)             | (7)             | (8)         |
| $CMKT_{t-1}$ | 0.01**            | 0.03**          | 0.04**             | -0.00*            | 0.00              | 0.02            | 0.04*           | 0.67**      |
|              | (2.25)            | (2.29)          | (2.00)             | (-1.67)           | (0.47)            | (1.47)          | (1.78)          | (2.59)      |
| Cons         | -0.00             | -0.01           | -0.01              | 0.00              | -0.00             | 0.00            | 0.00            | -0.13       |
|              | (-0.29)           | (-0.72)         | (-0.93)            | (0.20)            | (-0.88)           | (0.44)          | (0.05)          | (-0.71)     |
| $R^2$        | 0.05              | 0.05            | 0.04               | 0.03              | 0.00              | 0.02            | 0.03            | 0.07        |

**Table A.5: Multivariate Contemporaneous Regressions**

This table reports the contemporaneous regressions with network factor, production factor related to electricity, production factor related to computing, equity factors, currency factors, commodity factors, and macro factors. The standard t-statistic is reported in parentheses. \*, \*\*, \*\*\* denote significance levels at the 10%, 5%, and 1% based on the standard t-statistics. All independent variables are required for all tests, and the data frequency is monthly.

|                | (1)               | (2)              | (3)              | (4)              | (5)              | (6)              | (7)               |
|----------------|-------------------|------------------|------------------|------------------|------------------|------------------|-------------------|
| $PC^{network}$ | 0.17***<br>(3.96) |                  |                  |                  |                  |                  | 0.17***<br>(3.53) |
| $PC^{elec}$    |                   | -0.01<br>(-0.37) |                  |                  |                  |                  | -0.01<br>(-0.29)  |
| $p^{comp}$     |                   |                  | -0.01<br>(-0.18) |                  |                  |                  | -0.08<br>(-1.08)  |
| MKTRF          |                   |                  |                  | 4.16*<br>(1.67)  |                  |                  | 3.39<br>(0.93)    |
| SMB            |                   |                  |                  | -0.39<br>(-0.11) |                  |                  | 3.41<br>(0.86)    |
| HML            |                   |                  |                  | -2.94<br>(-0.66) |                  |                  | -5.53<br>(-1.15)  |
| RMW            |                   |                  |                  | 3.26<br>(0.56)   |                  |                  | 6.74<br>(1.13)    |
| CMA            |                   |                  |                  | 4.94<br>(0.71)   |                  |                  | 2.64<br>(0.34)    |
| AUSTRALIA      |                   |                  |                  |                  | -2.00<br>(-0.45) |                  | -4.13<br>(-0.89)  |
| CANADA         |                   |                  |                  |                  | -0.89<br>(-0.18) |                  | 5.43<br>(1.02)    |
| EURO           |                   |                  |                  |                  | 1.16<br>(0.25)   |                  | 1.58<br>(0.32)    |
| SINGAPORE      |                   |                  |                  |                  | 1.64<br>(0.17)   |                  | 3.87<br>(0.37)    |
| UK             |                   |                  |                  |                  | 2.09<br>(0.53)   |                  | -0.12<br>(-0.03)  |
| GOLD           |                   |                  |                  |                  |                  | -1.85<br>(-0.60) | -0.41<br>(-0.13)  |
| PLATINUM       |                   |                  |                  |                  |                  | 1.59<br>(0.73)   | 0.89<br>(0.34)    |
| SILVER         |                   |                  |                  |                  |                  | -1.03<br>(-0.51) | -1.74<br>(-0.83)  |
| $R^2$          | 0.17              | 0.00             | 0.00             | 0.05             | 0.01             | 0.02             | 0.26              |

**Table A.6: Multivariate Predictive Regressions**

This table reports the predictive regressions with momentum, attention, and network factors. The standard t-statistic is reported in parentheses. \*, \*\*, \*\*\* denote significance levels at the 10%, 5%, and 1% based on the standard t-statistics. The data frequency is weekly.

| Weekly           | $R_{t,t+1}$<br>(1) | $R_{t,t+2}$<br>(2) | $R_{t,t+3}$<br>(3) | $R_{t,t+4}$<br>(4) | $R_{t,t+5}$<br>(5) | $R_{t,t+6}$<br>(6) | $R_{t,t+7}$<br>(7) | $R_{t,t+8}$<br>(8) |
|------------------|--------------------|--------------------|--------------------|--------------------|--------------------|--------------------|--------------------|--------------------|
| $R_t$            | 0.08<br>(0.75)     | 0.31<br>(1.55)     | 0.49**<br>(2.12)   | 0.58**<br>(2.01)   | 0.65*<br>(1.94)    | 0.71*<br>(1.91)    | 0.76**<br>(1.98)   | 0.75*<br>(1.93)    |
| $Google_t$       | 0.00***<br>(3.57)  | 0.01***<br>(3.89)  | 0.01***<br>(4.05)  | 0.02***<br>(4.07)  | 0.02***<br>(3.17)  | 0.01*<br>(1.91)    | 0.01<br>(1.52)     | 0.01<br>(1.23)     |
| $\Delta user$    | 0.55<br>(1.47)     | 0.77<br>(1.28)     | 1.06<br>(1.15)     | 1.37<br>(1.30)     | 1.87<br>(1.38)     | 2.55<br>(1.41)     | 3.05<br>(1.26)     | 4.04<br>(1.22)     |
| $R^2$            | 0.07               | 0.11               | 0.11               | 0.10               | 0.08               | 0.05               | 0.04               | 0.04               |
| $R_t$            | 0.16**<br>(2.10)   | 0.40**<br>(2.34)   | 0.69***<br>(2.69)  | 0.94**<br>(2.39)   | 1.16**<br>(2.06)   | 1.42*<br>(1.80)    | 1.65*<br>(1.71)    | 1.44<br>(1.61)     |
| $Google_t$       | 0.00***<br>(3.37)  | 0.01***<br>(3.31)  | 0.01***<br>(3.17)  | 0.01***<br>(3.20)  | 0.02**<br>(2.49)   | 0.01<br>(1.39)     | 0.01<br>(0.87)     | 0.01<br>(0.77)     |
| $\Delta address$ | 0.13<br>(1.36)     | 0.36<br>(1.51)     | 0.37<br>(1.27)     | 0.44<br>(1.43)     | 0.54<br>(1.48)     | 0.54<br>(1.21)     | 1.07<br>(1.46)     | 1.02*<br>(1.73)    |
| $R^2$            | 0.07               | 0.12               | 0.11               | 0.10               | 0.08               | 0.06               | 0.05               | 0.02               |
| $R_t$            | 0.18**<br>(2.29)   | 0.44**<br>(2.46)   | 0.75***<br>(2.76)  | 1.02**<br>(2.40)   | 1.25**<br>(2.10)   | 1.52*<br>(1.82)    | 1.78*<br>(1.71)    | 1.57<br>(1.61)     |
| $Google_t$       | 0.00***<br>(3.50)  | 0.01***<br>(3.44)  | 0.01***<br>(3.24)  | 0.02***<br>(3.23)  | 0.02**<br>(2.53)   | 0.01<br>(1.45)     | 0.01<br>(1.01)     | 0.01<br>(0.87)     |
| $\Delta trans$   | -0.01<br>(-0.18)   | 0.09<br>(0.57)     | -0.05<br>(-0.22)   | -0.25<br>(-0.77)   | -0.20<br>(-0.47)   | -0.25<br>(-0.39)   | 0.05<br>(0.09)     | 0.05<br>(0.07)     |
| $R^2$            | 0.07               | 0.11               | 0.11               | 0.10               | 0.07               | 0.06               | 0.05               | 0.02               |
| $R_t$            | 0.19**<br>(2.36)   | 0.45**<br>(2.45)   | 0.74***<br>(2.71)  | 1.00**<br>(2.39)   | 1.21**<br>(2.07)   | 1.47*<br>(1.81)    | 1.75*<br>(1.70)    | 1.54<br>(1.63)     |
| $Google_t$       | 0.00***<br>(3.51)  | 0.01***<br>(3.45)  | 0.01***<br>(3.27)  | 0.02***<br>(3.27)  | 0.02**<br>(2.56)   | 0.01<br>(1.45)     | 0.01<br>(1.00)     | 0.01<br>(0.86)     |
| $\Delta payment$ | -0.04<br>(-1.05)   | 0.02<br>(0.28)     | 0.01<br>(0.16)     | -0.02<br>(-0.17)   | 0.10<br>(0.78)     | 0.11<br>(0.69)     | 0.23<br>(0.96)     | 0.20<br>(0.88)     |
| $R^2$            | 0.07               | 0.11               | 0.11               | 0.09               | 0.07               | 0.06               | 0.05               | 0.02               |
| $R_t$            | 0.09<br>(0.83)     | 0.31<br>(1.57)     | 0.52**<br>(2.15)   | 0.62**<br>(2.02)   | 0.68**<br>(1.98)   | 0.77*<br>(1.92)    | 0.82*<br>(1.92)    | 0.79*<br>(1.80)    |
| $Google_t$       | 0.01***<br>(3.69)  | 0.01***<br>(3.82)  | 0.01***<br>(3.89)  | 0.02***<br>(3.93)  | 0.02***<br>(3.11)  | 0.01*<br>(1.90)    | 0.01<br>(1.53)     | 0.01<br>(1.26)     |
| $PC^{network}$   | 0.00<br>(0.51)     | 0.01<br>(0.89)     | 0.00<br>(0.39)     | 0.00<br>(0.07)     | 0.01<br>(0.75)     | 0.01<br>(0.45)     | 0.01<br>(0.84)     | 0.04<br>(1.56)     |
| $R^2$            | 0.06               | 0.11               | 0.10               | 0.09               | 0.07               | 0.04               | 0.03               | 0.03               |

**Table A.7: Valuation Ratios and Past Returns**

This table reports the relationships between the valuation ratio measure and past coin market returns. The standard t-statistic is reported in parentheses and the bootstrapped t-statistic is reported in brackets. \*, \*\*, \*\*\* denote significance levels at the 10%, 5%, and 1% based on the standard t-statistics. The data frequency is weekly.

| Weekly       | $R_{t,t+1}$<br>(1) | $R_{t,t+2}$<br>(2) | $R_{t,t+3}$<br>(3) | $R_{t,t+4}$<br>(4) | $R_{t,t+5}$<br>(5) | $R_{t,t+6}$<br>(6) | $R_{t,t+7}$<br>(7) | $R_{t,t+8}$<br>(8) |
|--------------|--------------------|--------------------|--------------------|--------------------|--------------------|--------------------|--------------------|--------------------|
| Past 100     | 0.00<br>(0.07)     | 0.00<br>(0.05)     | 0.00<br>(0.03)     | -0.00<br>(-0.00)   | 0.00<br>(0.05)     | 0.01<br>(0.12)     | 0.01<br>(0.21)     | 0.02<br>(0.26)     |
| $R_t$        | 0.08<br>(0.68)     | 0.32<br>(1.63)     | 0.51*<br>(1.89)    | 0.57**<br>(2.25)   | 0.66**<br>(1.97)   | 0.64*<br>(1.91)    | 0.81*<br>(1.95)    | 0.86*<br>(1.94)    |
| $R^2$        | 0.01               | 0.04               | 0.05               | 0.03               | 0.03               | 0.02               | 0.02               | 0.02               |
| User/MCAP    | -0.00<br>(-0.60)   | -0.01<br>(-0.43)   | -0.01<br>(-0.35)   | -0.01<br>(-0.29)   | -0.01<br>(-0.22)   | -0.01<br>(-0.15)   | 0.00<br>(0.01)     | 0.01<br>(0.12)     |
| $R_t$        | 0.08<br>(0.67)     | 0.31<br>(1.62)     | 0.50*<br>(1.90)    | 0.56**<br>(2.28)   | 0.65**<br>(2.02)   | 0.63*<br>(1.94)    | 0.79**<br>(1.99)   | 0.85**<br>(1.99)   |
| $R^2$        | 0.01               | 0.04               | 0.05               | 0.03               | 0.03               | 0.02               | 0.02               | 0.02               |
| Address/MCAP | -0.00<br>(-0.60)   | -0.01<br>(-0.43)   | -0.01<br>(-0.35)   | -0.01<br>(-0.29)   | -0.01<br>(-0.22)   | -0.01<br>(-0.15)   | 0.00<br>(0.01)     | 0.01<br>(0.12)     |
| $R_t$        | 0.08<br>(0.67)     | 0.31<br>(1.62)     | 0.50*<br>(1.90)    | 0.56**<br>(2.28)   | 0.65**<br>(2.02)   | 0.63*<br>(1.94)    | 0.79**<br>(1.99)   | 0.85**<br>(1.99)   |
| $R^2$        | 0.01               | 0.04               | 0.05               | 0.03               | 0.03               | 0.02               | 0.02               | 0.02               |
| Trans/MCAP   | -0.00<br>(-0.60)   | -0.01<br>(-0.43)   | -0.01<br>(-0.35)   | -0.01<br>(-0.29)   | -0.01<br>(-0.22)   | -0.01<br>(-0.15)   | 0.00<br>(0.01)     | 0.01<br>(0.12)     |
| $R_t$        | 0.08<br>(0.67)     | 0.31<br>(1.62)     | 0.50*<br>(1.90)    | 0.56**<br>(2.28)   | 0.65**<br>(2.02)   | 0.63*<br>(1.94)    | 0.79**<br>(1.99)   | 0.85**<br>(1.99)   |
| $R^2$        | 0.01               | 0.04               | 0.05               | 0.03               | 0.03               | 0.02               | 0.02               | 0.02               |
| Pay/MCAP     | -0.01<br>(-1.31)   | -0.03<br>(-1.46)   | -0.04<br>(-1.39)   | -0.07<br>(-1.35)   | -0.09<br>(-1.24)   | -0.12<br>(-1.15)   | -0.14<br>(-1.00)   | -0.17<br>(-0.95)   |
| $R_t$        | 0.07<br>(0.72)     | 0.30**<br>(2.07)   | 0.53**<br>(2.21)   | 0.54**<br>(2.15)   | 0.86***<br>(2.70)  | 0.66**<br>(2.10)   | 1.00**<br>(2.12)   | 1.24*<br>(1.82)    |
| $R^2$        | 0.01               | 0.04               | 0.06               | 0.05               | 0.06               | 0.04               | 0.05               | 0.05               |
| PC           | 0.00<br>(0.82)     | 0.00<br>(0.63)     | 0.01<br>(0.52)     | 0.01<br>(0.48)     | 0.01<br>(0.55)     | 0.02<br>(0.65)     | 0.02<br>(0.78)     | 0.03<br>(0.83)     |
| $R_t$        | 0.08<br>(0.67)     | 0.32<br>(1.60)     | 0.51*<br>(1.85)    | 0.57**<br>(2.16)   | 0.66*<br>(1.93)    | 0.63*<br>(1.86)    | 0.80*<br>(1.91)    | 0.85*<br>(1.90)    |
| $R^2$        | 0.01               | 0.04               | 0.05               | 0.03               | 0.03               | 0.02               | 0.03               | 0.02               |



**Table A.8: Time-Series Momentum for High and Low Attention Coins**

This table reports the results that compare the time-series momentum results and the cross-sectional momentum results. Panel A reports the results of predicting cumulative future cross-sectional momentum with current coin market returns. Panel B reports the portfolio results. The Newey-West adjusted t-statistics with n-1 lags are reported in parentheses. \*, \*\*, \*\*\* denote significance levels at the 10%, 5%, and 1%. The data frequency is weekly.

| <b>High Attention</b> | $R_{t,t+1}^{high}$<br>(1) | $R_{t,t+2}^{high}$<br>(2) | $R_{t,t+3}^{high}$<br>(3) | $R_{t,t+4}^{high}$<br>(4) | $R_{t,t+5}^{high}$<br>(5) | $R_{t,t+6}^{high}$<br>(6) | $R_{t,t+7}^{high}$<br>(7) | $R_{t,t+8}^{high}$<br>(8) |
|-----------------------|---------------------------|---------------------------|---------------------------|---------------------------|---------------------------|---------------------------|---------------------------|---------------------------|
| $R_t^{high}$          | 0.03<br>(0.32)            | 0.12<br>(1.04)            | 0.26<br>(1.55)            | 0.26<br>(1.17)            | 0.26<br>(1.01)            | 0.41<br>(1.36)            | 0.29<br>(0.99)            | 0.23<br>(0.83)            |
| Cons                  | 0.01*<br>(1.82)           | 0.03**<br>(2.02)          | 0.04**<br>(2.05)          | 0.06**<br>(2.04)          | 0.08**<br>(2.01)          | 0.09**<br>(1.99)          | 0.12**<br>(1.98)          | 0.14*<br>(1.97)           |
| $R^2$                 | 0.00                      | 0.01                      | 0.02                      | 0.01                      | 0.01                      | 0.01                      | 0.01                      | 0.00                      |
| <b>Low Attention</b>  | $R_{t,t+1}^{low}$<br>(1)  | $R_{t,t+2}^{low}$<br>(2)  | $R_{t,t+3}^{low}$<br>(3)  | $R_{t,t+4}^{low}$<br>(4)  | $R_{t,t+5}^{low}$<br>(5)  | $R_{t,t+6}^{low}$<br>(6)  | $R_{t,t+7}^{low}$<br>(7)  | $R_{t,t+8}^{low}$<br>(8)  |
| $R_t^{low}$           | 0.33***<br>(3.07)         | 0.61**<br>(2.40)          | 0.77***<br>(2.75)         | 0.76***<br>(3.05)         | 1.15**<br>(2.42)          | 1.68*<br>(1.73)           | 2.03<br>(1.51)            | 1.96<br>(1.61)            |
| Cons                  | 0.01<br>(1.48)            | 0.04*<br>(1.85)           | 0.08*<br>(1.88)           | 0.13*<br>(1.87)           | 0.17*<br>(1.89)           | 0.22*<br>(1.91)           | 0.30*<br>(1.83)           | 0.39*<br>(1.68)           |
| $R^2$                 | 0.11                      | 0.10                      | 0.06                      | 0.03                      | 0.05                      | 0.07                      | 0.06                      | 0.03                      |

**Table A.9: Time-Series Momentum – Non-Cumulative Returns**

This table reports the time-series momentum results using non-cumulative future returns. \*, \*\*, \*\*\* denote significance levels at the 10%, 5%, and 1%. The data frequency is weekly.

| Regression Results |                   |                   |                   |                   |                   |                   |                   |                   |
|--------------------|-------------------|-------------------|-------------------|-------------------|-------------------|-------------------|-------------------|-------------------|
| Weekly             | $R_{t+1}$<br>(1)  | $R_{t+2}$<br>(2)  | $R_{t+3}$<br>(3)  | $R_{t+4}$<br>(4)  | $R_{t+5}$<br>(5)  | $R_{t+6}$<br>(6)  | $R_{t+7}$<br>(7)  | $R_{t+8}$<br>(8)  |
| $R_t$              | 0.20***<br>(4.11) | 0.24***<br>(4.92) | 0.23***<br>(4.76) | 0.09*<br>(1.75)   | 0.10**<br>(2.02)  | 0.04<br>(0.84)    | 0.04<br>(0.81)    | -0.06<br>(-1.31)  |
| Cons               | 0.03***<br>(3.38) | 0.03***<br>(3.21) | 0.03***<br>(3.19) | 0.03***<br>(3.68) | 0.03***<br>(3.49) | 0.03***<br>(3.66) | 0.03***<br>(3.73) | 0.03***<br>(4.18) |
| $R^2$              | 0.04              | 0.06              | 0.05              | 0.01              | 0.01              | 0.00              | 0.00              | 0.00              |

**Table A.10: Google Searches – Non-Cumulative Returns**

This table reports the time-series Google search results using non-cumulative future returns. \*, \*\*, \*\*\* denote significance levels at the 10%, 5%, and 1%. The data frequency is weekly.

| Regression Results |                   |                   |                   |                   |                   |                   |                   |                   |
|--------------------|-------------------|-------------------|-------------------|-------------------|-------------------|-------------------|-------------------|-------------------|
| Weekly             | $R_{t+1}$<br>(1)  | $R_{t+2}$<br>(2)  | $R_{t+3}$<br>(3)  | $R_{t+4}$<br>(4)  | $R_{t+5}$<br>(5)  | $R_{t+6}$<br>(6)  | $R_{t+7}$<br>(7)  | $R_{t+8}$<br>(8)  |
| $Google_t$         | 0.03***<br>(3.72) | 0.02***<br>(2.99) | 0.02**<br>(2.14)  | 0.02**<br>(2.34)  | 0.00<br>(0.58)    | -0.01<br>(-1.40)  | -0.01<br>(-1.19)  | -0.00<br>(-0.46)  |
| Cons               | 0.03***<br>(4.04) | 0.03***<br>(3.97) | 0.03***<br>(4.01) | 0.03***<br>(4.01) | 0.03***<br>(3.98) | 0.03***<br>(3.99) | 0.03***<br>(4.04) | 0.03***<br>(4.01) |
| $R^2$              | 0.03              | 0.02              | 0.01              | 0.01              | 0.00              | 0.00              | 0.00              | 0.00              |

**Table A.11: Split Sample**

This table shows some of the main results of the paper using the first half (01/01/2011–12/31/2014) and second half (01/01/2015–12/31/2018) of the sample. Panel A reports results on network effect. Panel B reports results on cryptocurrency momentum. Panel C reports results on investor attention. Panel A is monthly frequency. Panel B and Panel C are weekly frequency.

| Panel A          | First Half       |                   |                  |                   |                  | Second Half       |                   |                  |                  |                   |
|------------------|------------------|-------------------|------------------|-------------------|------------------|-------------------|-------------------|------------------|------------------|-------------------|
|                  | (1)              | (2)               | (3)              | (4)               | (5)              | (1)               | (2)               | (3)              | (4)              | (5)               |
| $\Delta user$    | 0.84<br>(1.27)   |                   |                  |                   |                  | 5.05**<br>(2.22)  |                   |                  |                  |                   |
| $\Delta address$ |                  | 1.11***<br>(4.68) |                  |                   |                  |                   | 1.35***<br>(3.40) |                  |                  |                   |
| $\Delta trans$   |                  |                   | 0.47**<br>(2.07) |                   |                  |                   |                   | 0.79**<br>(2.53) |                  |                   |
| $\Delta payment$ |                  |                   |                  | 0.68***<br>(3.35) |                  |                   |                   |                  | 0.53**<br>(2.25) |                   |
| $pC_{network}$   |                  |                   |                  |                   | 0.10**<br>(2.58) |                   |                   |                  |                  | 0.08***<br>(3.10) |
| Cons             | -0.03<br>(-0.23) | 0.02<br>(0.27)    | 0.09<br>(1.27)   | 0.05<br>(0.76)    | 0.07<br>(0.98)   | -0.21*<br>(-1.71) | 0.02<br>(0.67)    | 0.03<br>(0.90)   | 0.04<br>(1.22)   | 0.08**<br>(2.23)  |
| $R^2$            | 0.05             | 0.32              | 0.08             | 0.20              | 0.19             | 0.10              | 0.20              | 0.12             | 0.10             | 0.17              |

| Panel B     |                   |                   |                   |                   |                  |                  |                  |                  |
|-------------|-------------------|-------------------|-------------------|-------------------|------------------|------------------|------------------|------------------|
| First Half  | $R_{t,t+1}$       | $R_{t,t+2}$       | $R_{t,t+3}$       | $R_{t,t+4}$       | $R_{t,t+5}$      | $R_{t,t+6}$      | $R_{t,t+7}$      | $R_{t,t+8}$      |
|             | (1)               | (2)               | (3)               | (4)               | (5)              | (6)              | (7)              | (8)              |
| $R_t$       | 0.23**<br>(2.31)  | 0.55**<br>(2.40)  | 0.87**<br>(2.59)  | 1.22**<br>(2.45)  | 1.49**<br>(2.12) | 1.75*<br>(1.81)  | 2.13*<br>(1.74)  | 1.84*<br>(1.70)  |
| Cons        | 0.04***<br>(2.95) | 0.08***<br>(3.20) | 0.14***<br>(3.00) | 0.21***<br>(2.84) | 0.30**<br>(2.57) | 0.40**<br>(2.43) | 0.52**<br>(2.32) | 0.69**<br>(2.12) |
| $R^2$       | 0.05              | 0.09              | 0.09              | 0.09              | 0.07             | 0.06             | 0.05             | 0.02             |
| Second Half | $R_{t,t+1}$       | $R_{t,t+2}$       | $R_{t,t+3}$       | $R_{t,t+4}$       | $R_{t,t+5}$      | $R_{t,t+6}$      | $R_{t,t+7}$      | $R_{t,t+8}$      |
|             | (1)               | (2)               | (3)               | (4)               | (5)              | (6)              | (7)              | (8)              |
| $R_t$       | 0.07<br>(0.83)    | 0.24*<br>(1.69)   | 0.50**<br>(2.45)  | 0.43<br>(1.47)    | 0.45<br>(1.28)   | 0.54<br>(1.29)   | 0.43<br>(1.01)   | 0.30<br>(0.89)   |
| Cons        | 0.02**<br>(2.25)  | 0.04**<br>(2.55)  | 0.06**<br>(2.49)  | 0.08**<br>(2.53)  | 0.11**<br>(2.48) | 0.14**<br>(2.42) | 0.17**<br>(2.39) | 0.21**<br>(2.32) |
| $R^2$       | 0.01              | 0.03              | 0.06              | 0.03              | 0.02             | 0.02             | 0.01             | 0.00             |

| Panel C     |                   |                   |                   |                   |                   |                  |                  |                  |
|-------------|-------------------|-------------------|-------------------|-------------------|-------------------|------------------|------------------|------------------|
| First Half  | $R_{t,t+1}$       | $R_{t,t+2}$       | $R_{t,t+3}$       | $R_{t,t+4}$       | $R_{t,t+5}$       | $R_{t,t+6}$      | $R_{t,t+7}$      | $R_{t,t+8}$      |
|             | (1)               | (2)               | (3)               | (4)               | (5)               | (6)              | (7)              | (8)              |
| $Google_t$  | 0.03**<br>(2.07)  | 0.05*<br>(1.70)   | 0.07<br>(1.31)    | 0.08<br>(1.28)    | 0.10<br>(1.48)    | 0.12<br>(1.56)   | 0.12<br>(1.43)   | 0.12<br>(1.33)   |
| Cons        | 0.04***<br>(3.23) | 0.10***<br>(3.04) | 0.17***<br>(2.72) | 0.25**<br>(2.52)  | 0.36**<br>(2.36)  | 0.48**<br>(2.25) | 0.61**<br>(2.14) | 0.77**<br>(2.06) |
| $R^2$       | 0.03              | 0.02              | 0.01              | 0.01              | 0.01              | 0.01             | 0.00             | 0.00             |
| Second Half | $R_{t,t+1}$       | $R_{t,t+2}$       | $R_{t,t+3}$       | $R_{t,t+4}$       | $R_{t,t+5}$       | $R_{t,t+6}$      | $R_{t,t+7}$      | $R_{t,t+8}$      |
|             | (1)               | (2)               | (3)               | (4)               | (5)               | (6)              | (7)              | (8)              |
| $Google_t$  | 0.04***<br>(3.36) | 0.07***<br>(4.72) | 0.09***<br>(5.62) | 0.12***<br>(4.89) | 0.13***<br>(3.64) | 0.11**<br>(2.31) | 0.09*<br>(1.91)  | 0.09<br>(1.60)   |
| Cons        | 0.02**<br>(2.55)  | 0.04***<br>(2.90) | 0.06***<br>(2.82) | 0.09***<br>(2.74) | 0.12***<br>(2.62) | 0.15**<br>(2.48) | 0.18**<br>(2.42) | 0.22**<br>(2.37) |
| $R^2$       | 0.09              | 0.15              | 0.15              | 0.15              | 0.12              | 0.06             | 0.03             | 0.02             |

**Table A.12: Time-Series and Cross-Sectional Momentum**

This table reports the results that compare the time-series momentum results and the cross-sectional momentum results. Panel A reports the results of predicting cumulative future cross-sectional momentum with current coin market returns. Panel B reports the portfolio results. The Newey-West adjusted t-statistics with n-1 lags are reported in parentheses. \*, \*\*, \*\*\* denote significance levels at the 10%, 5%, and 1%. The data frequency is weekly.

| <b>Panel A: Regression Results</b> |                   |                   |                   |                   |                   |                   |                   |                   |
|------------------------------------|-------------------|-------------------|-------------------|-------------------|-------------------|-------------------|-------------------|-------------------|
|                                    | $CMOM_{t,t+1}$    | $CMOM_{t,t+2}$    | $CMOM_{t,t+3}$    | $CMOM_{t,t+4}$    | $CMOM_{t,t+5}$    | $CMOM_{t,t+6}$    | $CMOM_{t,t+7}$    | $CMOM_{t,t+8}$    |
|                                    | (1)               | (2)               | (3)               | (4)               | (5)               | (6)               | (7)               | (8)               |
| $CMKT_t$                           | -0.01<br>(-0.11)  | 0.05<br>(0.25)    | -0.01<br>(-0.07)  | -0.12<br>(-0.58)  | -0.17<br>(-0.75)  | -0.32<br>(-1.27)  | -0.47<br>(-1.62)  | -0.52*<br>(-1.70) |
| Cons                               | 0.04***<br>(3.39) | 0.07***<br>(4.03) | 0.11***<br>(3.93) | 0.15***<br>(3.65) | 0.19***<br>(3.49) | 0.24***<br>(3.36) | 0.29***<br>(3.25) | 0.34***<br>(3.18) |
| $R^2$                              | 0.00              | 0.00              | 0.00              | 0.00              | 0.00              | 0.00              | 0.01              | 0.01              |

  

| <b>Panel B: Portfolio Results</b> |           |                   |                  |                 |                   |
|-----------------------------------|-----------|-------------------|------------------|-----------------|-------------------|
|                                   |           | Alpha             | CMKT             | CSMB            | CMOM              |
| Top 3                             | Mean      | 3.17***<br>(3.18) |                  |                 |                   |
|                                   | C-1       | 2.95***<br>(2.95) | 0.17*<br>(1.95)  |                 |                   |
|                                   | CMOM Only | 2.36**<br>(2.41)  |                  |                 | 0.23***<br>(4.51) |
|                                   | C-3       | 1.91*<br>(1.95)   | 0.14*<br>(1.69)  | 0.13*<br>(1.84) | 0.23***<br>(4.53) |
|                                   | Mean      | 4.13***<br>(2.89) |                  |                 |                   |
| Top 5                             | C-1       | 4.13***<br>(2.85) | -0.02<br>(-0.12) |                 |                   |
|                                   | CMOM Only | 3.10**<br>(2.19)  |                  |                 | 0.29***<br>(3.93) |
|                                   | C-3       | 2.83**<br>(.97)   | -0.05<br>(-0.38) | 0.16<br>(1.57)  | 0.29***<br>(3.89) |
|                                   | Mean      | 4.62***<br>(3.43) |                  |                 |                   |
|                                   | C-1       | 4.52***<br>(3.33) | 0.05<br>(0.46)   |                 |                   |
| Top 10                            | CMOM Only | 3.52***<br>(2.67) |                  |                 | 0.31***<br>(4.50) |
|                                   | C-3       | 3.18**<br>(2.38)  | 0.03<br>(0.22)   | 0.14<br>(1.54)  | 0.31<br>(4.47)    |

**Table A.13: Regulation and Cryptocurrency Returns**

This table documents the responses of cryptocurrency prices to the contemporaneous regulative events. Reg is a dummy variable that equals one if there is a regulative event in the day and zero otherwise. Reg Positive is a dummy variable that equals one if there is a positive regulative event in the day and zero otherwise. Reg Negative is a dummy variable that equals one if there is a negative regulative event in the day and zero otherwise. Reg Directed equals one if there is a positive regulative event, equals negative one if there is a negative regulative event, and equals zero if there is not a regulative event in the day. T-statistics in parentheses and brackets are based on standard OLS and bootstrap, respectively. \*, \*\*, \*\*\* denote significance levels at the 10%, 5%, and 1% based on standard OLS t-statistics. The data frequency is daily.

|              | Return<br>(1)                  | Return<br>(2)               | Return<br>(3)                  | Return<br>(4)              |
|--------------|--------------------------------|-----------------------------|--------------------------------|----------------------------|
| Reg          | -0.01***<br>(-3.14)<br>[-2.77] |                             |                                |                            |
| Reg Positive |                                | -0.01<br>(-0.94)<br>[-0.69] |                                |                            |
| Reg Negative |                                |                             | -0.02***<br>(-3.22)<br>[-2.72] |                            |
| Reg Directed |                                |                             |                                | 0.01**<br>(2.39)<br>[1.96] |
| R-squared    | 0.003                          | 0.000                       | 0.004                          | 0.002                      |

**Table A.14: Speculative Interest and Cryptocurrency Return**

This table documents the responses of cryptocurrency prices to changes in speculative shares. Panel A documents the exposures of cryptocurrency returns to changes in contemporaneous speculative shares. Panel B documents the results of predicting cumulative future speculative share growths with the coin market returns. T-statistics in Panel B are based on the Newey-West adjustment procedure. \*, \*\*, \*\*\* denote significance levels at the 10%, 5%, and 1%. The data frequency is monthly.

| Panel A                    | Return<br>(1)  | Return<br>(2)  | Return<br>(3)     | Return<br>(4)     | Return<br>(5)    |
|----------------------------|----------------|----------------|-------------------|-------------------|------------------|
| $\Delta\text{Speculation}$ | 0.27<br>(1.18) | 0.23<br>(1.04) | 0.16<br>(0.76)    | 0.21<br>(1.02)    | 0.17<br>(0.81)   |
| $\Delta\text{user}$        |                | 4.82<br>(1.48) |                   |                   |                  |
| $\Delta\text{address}$     |                |                | 1.57***<br>(2.94) |                   |                  |
| $\Delta\text{trans}$       |                |                |                   | 1.19***<br>(2.79) |                  |
| $\Delta\text{payment}$     |                |                |                   |                   | 1.09**<br>(2.49) |
| R-squared                  | 0.04           | 0.10           | 0.24              | 0.23              | 0.20             |

  

| Panel B     | (1)            | (2)            | (3)             | $\Delta\text{Speculation}$ |                |                |                |                  |
|-------------|----------------|----------------|-----------------|----------------------------|----------------|----------------|----------------|------------------|
|             | (1)            | (2)            | (3)             | (4)                        | (5)            | (6)            | (7)            | (8)              |
| <i>cmkt</i> | 0.01<br>(0.36) | 0.05<br>(1.00) | 0.12*<br>(1.90) | 0.11<br>(1.51)             | 0.13<br>(1.17) | 0.20<br>(1.39) | 0.25<br>(1.36) | 0.35**<br>(2.47) |
| <i>Cons</i> | 0.02<br>(0.60) | 0.05<br>(1.19) | 0.06<br>(1.04)  | 0.09<br>(1.33)             | 0.11<br>(1.23) | 0.11<br>(1.11) | 0.12<br>(1.03) | 0.12<br>(0.90)   |
| $R^2$       | 0.00           | 0.01           | 0.04            | 0.02                       | 0.02           | 0.05           | 0.06           | 0.10             |

**Table A.15: Sentiment and Cryptocurrency Return**

This table reports the results of predicting future cryptocurrency returns with current cryptocurrency sentiment. The measure of cryptocurrency sentiment is defined as the log ratio between the count of positive and the count of negative phrases of cryptocurrencies in Google searches. Positive phrases include the following twenty words when they appear with “Bitcoin”: “up”, “long”, “buy”, “good”, “bullish”, “high”, “surge”, “strong”, “add”, “positive”, “increase”, “benefit”, “green”, “attract”, “nice”, “undervalue”, “cheap”, “bought”, “soar”, and “great”. Negative phrases include the following twenty words when they appear with “Bitcoin”: “down”, “short”, “sell”, “bad”, “bearish”, “low”, “crash”, “weak”, “minus”, “negative”, “decrease”, “loss”, “red”, “dump”, “drop”, “overvalue”, “expensive”, “sold”, “collapse”, and “worse”. The Newey-West adjusted t-statistics with n-1 lags are reported in parentheses. \*, \*\*, \*\*\* denote significance levels at the 10%, 5%, and 1%. The data frequency is weekly.

| Weekly        | $R_{t,t+1}$<br>(1) | $R_{t,t+2}$<br>(2) | $R_{t,t+3}$<br>(3) | $R_{t,t+4}$<br>(4) | $R_{t,t+5}$<br>(5) | $R_{t,t+6}$<br>(6) | $R_{t,t+7}$<br>(7) | $R_{t,t+8}$<br>(8) |
|---------------|--------------------|--------------------|--------------------|--------------------|--------------------|--------------------|--------------------|--------------------|
| $Sentiment_t$ | 0.04**<br>(2.45)   | 0.06**<br>(2.38)   | 0.10***<br>(2.92)  | 0.11**<br>(2.47)   | 0.11**<br>(2.24)   | 0.18<br>(1.59)     | 0.15<br>(1.51)     | 0.17<br>(1.31)     |
| $R^2$         | 0.03               | 0.02               | 0.03               | 0.02               | 0.01               | 0.02               | 0.01               | 0.01               |
| $Sentiment_t$ | 0.04**<br>(2.47)   | 0.06**<br>(2.42)   | 0.10***<br>(2.97)  | 0.11**<br>(2.51)   | 0.11**<br>(2.26)   | 0.18<br>(1.59)     | 0.15<br>(1.51)     | 0.17<br>(1.31)     |
| $Google_t$    | 0.03***<br>(3.94)  | 0.05***<br>(4.35)  | 0.07***<br>(4.32)  | 0.09***<br>(4.17)  | 0.10***<br>(3.29)  | 0.09**<br>(2.09)   | 0.08*<br>(1.76)    | 0.07<br>(1.48)     |
| $R^2$         | 0.08               | 0.09               | 0.09               | 0.08               | 0.05               | 0.05               | 0.02               | 0.02               |
| $Sentiment_t$ | 0.04**<br>(2.25)   | 0.06**<br>(2.39)   | 0.10***<br>(3.01)  | 0.11**<br>(2.59)   | 0.11**<br>(2.28)   | 0.18<br>(1.62)     | 0.14<br>(1.53)     | 0.17<br>(1.32)     |
| $R_t$         | 0.14<br>(1.30)     | 0.41*<br>(1.95)    | 0.61**<br>(2.51)   | 0.75**<br>(2.39)   | 0.84**<br>(2.32)   | 0.92**<br>(2.29)   | 0.98**<br>(2.26)   | 0.99**<br>(2.12)   |
| $R^2$         | 0.05               | 0.08               | 0.09               | 0.07               | 0.06               | 0.06               | 0.04               | 0.03               |
| $Sentiment_t$ | 0.04**<br>(2.30)   | 0.06**<br>(2.42)   | 0.10***<br>(3.02)  | 0.11**<br>(2.59)   | 0.11**<br>(2.27)   | 0.18<br>(1.61)     | 0.14<br>(1.52)     | 0.17<br>(1.31)     |
| $Google_t$    | 0.03***<br>(3.68)  | 0.05***<br>(3.65)  | 0.06***<br>(3.62)  | 0.09***<br>(3.80)  | 0.09***<br>(3.04)  | 0.08*<br>(1.83)    | 0.07<br>(1.49)     | 0.06<br>(1.24)     |
| $R_t$         | 0.11<br>(1.09)     | 0.36*<br>(1.76)    | 0.56**<br>(2.35)   | 0.67**<br>(2.22)   | 0.76**<br>(2.14)   | 0.85**<br>(2.14)   | 0.91**<br>(2.13)   | 0.93**<br>(2.00)   |
| $R^2$         | 0.10               | 0.14               | 0.14               | 0.12               | 0.09               | 0.07               | 0.05               | 0.04               |

**Table A.16: Volume-Volatility Ratio and Cryptocurrency Return**

This table reports the results of predicting future cryptocurrency returns with current cryptocurrency volume-volatility ratio. The volume-volatility ratio is defined as the log of the ratio between the cryptocurrency trading volume and the standard deviation of the coin market returns. The first column reports the result of regressing the coin market returns on the contemporaneous volume-volatility ratio. Columns (2)-(9) report the results of regressing one to eight week ahead cumulative coin market returns with current volume-volatility ratio. The Newey-West adjusted t-statistics with n-1 lags are reported in parentheses for the predictive regressions. \*, \*\*, \*\*\* denote significance levels at the 10%, 5%, and 1%. The data frequency is weekly.

| Weekly    | $R_t$             | $R_{t,t+1}$    | $R_{t,t+2}$    | $R_{t,t+3}$      | $R_{t,t+4}$      | $R_{t,t+5}$      | $R_{t,t+6}$      | $R_{t,t+7}$      | $R_{t,t+8}$      |
|-----------|-------------------|----------------|----------------|------------------|------------------|------------------|------------------|------------------|------------------|
|           | (1)               | (2)            | (3)            | (4)              | (5)              | (6)              | (7)              | (8)              | (9)              |
| $Ratio_t$ | 0.01***<br>(2.61) | 0.00<br>(0.29) | 0.00<br>(0.17) | -0.00<br>(-0.04) | -0.00<br>(-0.10) | -0.01<br>(-0.20) | -0.02<br>(-0.24) | -0.02<br>(-0.30) | -0.03<br>(-0.34) |
| $R^2$     | 0.02              | 0.00           | 0.00           | 0.00             | 0.00             | 0.00             | 0.00             | 0.00             | 0.00             |



**Table A.17: Twitter**

This table reports the time-series Twitter posting results. Panel A shows the regression results and Panel B shows the results by grouping weekly coin market returns into terciles. Twitter posting measure is constructed as the Twitter posting data for the word “Bitcoin” minus the its average of the previous four weeks, and then normalized to have mean zero and standard deviation of one. The t-statistics are reported in parentheses and are Newey-West adjusted with n-1 lags. \*, \*\*, \*\*\* denote significance levels at the 10%, 5%, and 1%. The data frequency is weekly.

| Panel A     | $R_{t+1}$<br>(1)  | $R_{t+2}$<br>(2)  | $R_{t+3}$<br>(3)  | $R_{t+4}$<br>(4)  | $R_{t+5}$<br>(5)  | $R_{t+6}$<br>(6)  | $R_{t+7}$<br>(7)  |
|-------------|-------------------|-------------------|-------------------|-------------------|-------------------|-------------------|-------------------|
| $Twitter_t$ | 0.03***<br>(3.46) | 0.03***<br>(3.40) | 0.01<br>(0.95)    | 0.02***<br>(3.63) | 0.02*<br>(1.93)   | -0.00<br>(-0.44)  | -0.00<br>(-0.38)  |
| Cons        | 0.04***<br>(4.46) | 0.04***<br>(4.08) | 0.04***<br>(3.58) | 0.03***<br>(3.28) | 0.04***<br>(3.14) | 0.04***<br>(2.99) | 0.04***<br>(2.89) |
| R-Squared   | 0.02              | 0.01              | 0.02              | 0.02              | 0.01              | 0.00              | 0.00              |

| Panel B    |         |           |              |           |              |
|------------|---------|-----------|--------------|-----------|--------------|
| Rank       | Twitter | $R_{t+1}$ | T-Statistics | $R_{t+2}$ | T-Statistics |
| Low        | -0.80   | -1.39     | -1.12        | -1.86     | -1.12        |
| 2          | -0.10   | 1.23      | 0.91         | 3.71      | 0.91         |
| 3          | -0.04   | 6.47      | 2.33         | 13.40     | 2.33         |
| 4          | 0.05    | 6.32      | 3.96         | 16.49     | 3.96         |
| 5          | 0.91    | 6.30      | 3.06         | 8.23      | 3.06         |
| Difference |         | 7.69      |              | 10.09     |              |
| Rank       | Twitter | $R_{t+3}$ | T-Statistics | $R_{t+4}$ | T-Statistics |
| Low        | -0.80   | -3.41     | -0.41        | -3.71     | -1.18        |
| 2          | -0.10   | 7.03      | 1.93         | 12.45     | 1.33         |
| 3          | -0.04   | 24.89     | 2.07         | 38.54     | 2.92         |
| 4          | 0.05    | 24.36     | 3.90         | 33.17     | 2.89         |
| 5          | 0.91    | 12.43     | 1.24         | 15.83     | 2.57         |
| Difference |         | 15.84     |              | 19.54     |              |

**Table A.18: Cryptocurrency Return Loadings to Electricity Factors for Three Major Coins**

This table reports the factor loadings of the Bitcoin returns, Ethereum returns, and Ripple returns on the production factors that relate to electricity costs. The table reports the factor loadings of the coin returns on the production factors. The standard t-statistic is reported in parentheses. \*, \*\*, \*\*\* denote significance levels at the 10%, 5%, and 1% based on the standard t-statistics. The data frequency is monthly.

| Bitcoin            | (1)               | (2)               | (3)               | (4)               | (5)               | (6)               | (7)               | (8)               |
|--------------------|-------------------|-------------------|-------------------|-------------------|-------------------|-------------------|-------------------|-------------------|
| $\Delta Price$ US  | -1.14<br>(-0.39)  |                   |                   |                   |                   |                   |                   |                   |
| $\Delta Gen$ US    |                   | 0.11<br>(0.15)    |                   |                   |                   |                   |                   |                   |
| $\Delta Consum$ US |                   |                   | 0.07<br>(0.14)    |                   |                   |                   |                   |                   |
| $\Delta Price$ CN  |                   |                   |                   | -7.54<br>(-0.78)  |                   |                   |                   |                   |
| $\Delta Price$ SC  |                   |                   |                   |                   | 2.41<br>(0.39)    |                   |                   |                   |
| $\Delta Gen$ CN    |                   |                   |                   |                   |                   | 0.07<br>(0.08)    |                   |                   |
| $\Delta Gen$ SC    |                   |                   |                   |                   |                   |                   | -0.49<br>(-1.01)  |                   |
| $PC^{elec}$        |                   |                   |                   |                   |                   |                   |                   | -0.00<br>(-0.11)  |
| Cons               | 0.20***<br>(2.88) | 0.20***<br>(2.87) | 0.20***<br>(2.87) | 0.19***<br>(2.75) | 0.19***<br>(2.79) | 0.19***<br>(2.65) | 0.19***<br>(2.74) | 0.19***<br>(2.67) |
| $R^2$              | 0.00              | 0.00              | 0.00              | 0.01              | 0.00              | 0.00              | 0.01              | 0.00              |

  

| Ethereum           | (1)              | (2)              | (3)              | (4)              | (5)              | (6)              | (7)              | (8)              |
|--------------------|------------------|------------------|------------------|------------------|------------------|------------------|------------------|------------------|
| $\Delta Price$ US  | 4.07<br>(0.87)   |                  |                  |                  |                  |                  |                  |                  |
| $\Delta Gen$ US    |                  | 0.84<br>(0.81)   |                  |                  |                  |                  |                  |                  |
| $\Delta Consum$ US |                  |                  | 0.17<br>(0.26)   |                  |                  |                  |                  |                  |
| $\Delta Price$ CN  |                  |                  |                  | 16.38<br>(0.47)  |                  |                  |                  |                  |
| $\Delta Price$ SC  |                  |                  |                  |                  | 3.41<br>(0.57)   |                  |                  |                  |
| $\Delta Gen$ CN    |                  |                  |                  |                  |                  | 0.15<br>(0.10)   |                  |                  |
| $\Delta Gen$ SC    |                  |                  |                  |                  |                  |                  | 0.50<br>(0.72)   |                  |
| $PC^{elec}$        |                  |                  |                  |                  |                  |                  |                  | 0.04<br>(0.73)   |
| Cons               | 0.24**<br>(2.33) | 0.24**<br>(2.31) | 0.23**<br>(2.27) | 0.24**<br>(2.31) | 0.24**<br>(2.32) | 0.23**<br>(2.24) | 0.23**<br>(2.29) | 0.23**<br>(2.27) |
| $R^2$              | 0.02             | 0.02             | 0.00             | 0.01             | 0.01             | 0.00             | 0.01             | 0.01             |

| Ripple             | (1)              | (2)             | (3)             | (4)             | (5)             | (6)             | (7)              | (8)             |
|--------------------|------------------|-----------------|-----------------|-----------------|-----------------|-----------------|------------------|-----------------|
| $\Delta$ Price US  | -5.71<br>(-0.77) |                 |                 |                 |                 |                 |                  |                 |
| $\Delta$ Gen US    |                  | 2.59<br>(1.43)  |                 |                 |                 |                 |                  |                 |
| $\Delta$ Consum US |                  |                 | 1.29<br>(1.07)  |                 |                 |                 |                  |                 |
| $\Delta$ Price CN  |                  |                 |                 | 19.59<br>(0.27) |                 |                 |                  |                 |
| $\Delta$ Price SC  |                  |                 |                 |                 | 0.51<br>(0.04)  |                 |                  |                 |
| $\Delta$ Gen CN    |                  |                 |                 |                 |                 | 1.04<br>(0.52)  |                  |                 |
| $\Delta$ Gen SC    |                  |                 |                 |                 |                 |                 | -1.85<br>(-1.65) |                 |
| $PC^{elec}$        |                  |                 |                 |                 |                 |                 |                  | 0.02<br>(0.24)  |
| Cons               | 0.32*<br>(1.89)  | 0.33*<br>(1.97) | 0.33*<br>(1.96) | 0.33*<br>(1.92) | 0.33*<br>(1.90) | 0.32*<br>(1.88) | 0.33*<br>(1.98)  | 0.33*<br>(1.90) |
| $R^2$              | 0.01             | 0.03            | 0.02            | 0.00            | 0.00            | 0.00            | 0.04             | 0.00            |

**Table A.19: Cryptocurrency Return Loadings to Computing Factors for Three Major Coins**

This table reports the factor loadings of the coin market returns on the production factors that relate to computing costs. Panel A shows the correlation matrix of the production factors. Panel B reports the factor loadings of the coin market returns on the production factors. The standard t-statistic is reported in parentheses. \*, \*\*, \*\*\* denote significance levels at the 10%, 5%, and 1% based on the standard t-statistics. The data frequency is monthly.

| Bitcoin                       | (1)              | (2)            | (3)              | (4)              | (5)              | (6)              |
|-------------------------------|------------------|----------------|------------------|------------------|------------------|------------------|
| $\Delta\text{Price Antminer}$ | 0.27**<br>(2.25) |                |                  |                  |                  |                  |
| Nvidia                        |                  | 0.45<br>(0.80) |                  |                  |                  |                  |
| AMD                           |                  |                | 0.02<br>(0.05)   |                  |                  |                  |
| TSMC                          |                  |                |                  | 0.22<br>(0.18)   |                  |                  |
| ASE                           |                  |                |                  |                  | 0.53<br>(0.59)   |                  |
| $PC^{comp}$                   |                  |                |                  |                  |                  | 0.01<br>(0.26)   |
| $R^2$                         | 0.12             | 0.01           | 0.00             | 0.00             | 0.00             | 0.00             |
| Ethereum                      | (1)              | (2)            | (3)              | (4)              | (5)              | (6)              |
| $\Delta\text{Price Antminer}$ | 0.14<br>(0.42)   |                |                  |                  |                  |                  |
| Nvidia                        |                  | 0.76<br>(1.00) |                  |                  |                  |                  |
| AMD                           |                  |                | -0.64<br>(-1.17) |                  |                  |                  |
| TSMC                          |                  |                |                  | 2.04<br>(1.29)   |                  |                  |
| ASE                           |                  |                |                  |                  | 0.87<br>(0.68)   |                  |
| $PC^{comp}$                   |                  |                |                  |                  |                  | 0.05<br>(0.69)   |
| $R^2$                         | 0.00             | 0.03           | 0.03             | 0.04             | 0.01             | 0.01             |
| Ripple                        | (1)              | (2)            | (3)              | (4)              | (5)              | (6)              |
| $\Delta\text{Price Antminer}$ | 0.44<br>(0.58)   |                |                  |                  |                  |                  |
| Nvidia                        |                  | 0.41<br>(0.28) |                  |                  |                  |                  |
| AMD                           |                  |                | -0.83<br>(-0.82) |                  |                  |                  |
| TSMC                          |                  |                |                  | -1.31<br>(-0.45) |                  |                  |
| ASE                           |                  |                |                  |                  | -0.40<br>(-0.18) |                  |
| $PC^{comp}$                   |                  |                |                  |                  |                  | -0.05<br>(-0.33) |
| $R^2$                         | 0.01             | 0.00           | 0.01             | 0.00             | 0.00             | 0.00             |

**Table A.20: Time-Series Momentum for Three Major Coins**

This table reports the time-series momentum results for Bitcoin, Ethereum, and Ripple. Panel A shows the regression results and Panel B shows the results by grouping weekly coin market returns into terciles. The first part of Panel B reports results for the whole sample. The second part of Panel B uses the first two years of data to determine the tercile cutoffs and examine the out-of-sample time-series momentum performance. The Newey-West adjusted t-statistics with n-1 lags are reported in parentheses. \*, \*\*, \*\*\* denote significance levels at the 10%, 5%, and 1%. The data frequency is weekly.

| Panel A: Regression Results |                    |                    |                    |                    |                    |                    |                    |                    |
|-----------------------------|--------------------|--------------------|--------------------|--------------------|--------------------|--------------------|--------------------|--------------------|
| Bitcoin                     | $R_{t,t+1}$<br>(1) | $R_{t,t+2}$<br>(2) | $R_{t,t+3}$<br>(3) | $R_{t,t+4}$<br>(4) | $R_{t,t+5}$<br>(5) | $R_{t,t+6}$<br>(6) | $R_{t,t+7}$<br>(7) | $R_{t,t+8}$<br>(8) |
| $R_t$                       | 0.18**<br>(2.34)   | 0.45**<br>(2.50)   | 0.75***<br>(2.77)  | 1.00**<br>(2.44)   | 1.22**<br>(2.07)   | 1.47*<br>(1.80)    | 1.76*<br>(1.69)    | 1.58*<br>(1.68)    |
| Cons                        | 0.03***<br>(3.80)  | 0.06***<br>(4.18)  | 0.10***<br>(3.87)  | 0.14***<br>(3.68)  | 0.20***<br>(3.31)  | 0.26***<br>(3.09)  | 0.33***<br>(2.92)  | 0.43***<br>(2.60)  |
| $R^2$                       | 0.03               | 0.07               | 0.08               | 0.07               | 0.06               | 0.05               | 0.04               | 0.02               |
| Ethereum                    |                    |                    |                    |                    |                    |                    |                    |                    |
| $R_t$                       | 0.10<br>(1.41)     | 0.19*<br>(1.77)    | 0.50**<br>(2.49)   | 0.53*<br>(1.87)    | 0.47<br>(1.50)     | 0.73<br>(1.58)     | 0.85<br>(1.43)     | 0.68<br>(1.30)     |
| Cons                        | 0.04**<br>(2.56)   | 0.09***<br>(2.82)  | 0.14***<br>(2.71)  | 0.22***<br>(2.73)  | 0.32***<br>(2.63)  | 0.40**<br>(2.54)   | 0.51**<br>(2.47)   | 0.66**<br>(2.35)   |
| $R^2$                       | 0.01               | 0.02               | 0.06               | 0.03               | 0.02               | 0.02               | 0.02               | 0.01               |
| Ripple                      |                    |                    |                    |                    |                    |                    |                    |                    |
| $R_t$                       | 0.05<br>(0.56)     | 0.11<br>(0.77)     | 0.11<br>(0.63)     | 0.02<br>(0.19)     | 0.12<br>(1.33)     | 0.22<br>(1.42)     | 0.43<br>(1.50)     | 0.27<br>(1.09)     |
| Cons                        | 0.06**<br>(2.17)   | 0.12**<br>(2.41)   | 0.21**<br>(2.37)   | 0.31**<br>(2.27)   | 0.38**<br>(2.26)   | 0.49**<br>(2.21)   | 0.61**<br>(2.07)   | 0.80*<br>(1.85)    |
| $R^2$                       | 0.00               | 0.00               | 0.00               | 0.00               | 0.00               | 0.00               | 0.01               | 0.00               |

  

| Panel B: Sorting Results |           |             |        |             |        |             |        |             |        |
|--------------------------|-----------|-------------|--------|-------------|--------|-------------|--------|-------------|--------|
| Bitcoin                  |           |             |        |             |        |             |        |             |        |
| Rank                     | Formation | $R_{t,t+1}$ | t-stat | $R_{t,t+2}$ | t-stat | $R_{t,t+3}$ | t-stat | $R_{t,t+4}$ | t-stat |
| Low                      | -10.57    | 1.65        | (1.41) | 3.66        | (1.80) | 5.55        | (1.67) | 8.89        | (1.93) |
| Middle                   | 1.89      | 0.98        | (1.09) | 2.98        | (2.12) | 5.38        | (2.28) | 7.34        | (3.44) |
| High                     | 19.18     | 7.71        | (4.16) | 15.83       | (4.82) | 25.95       | (5.37) | 37.89       | (5.24) |
| Difference               |           | 6.06        |        | 12.17       |        | 20.40       |        | 29.00       |        |
| Ethereum                 |           |             |        |             |        |             |        |             |        |
| Rank                     | Formation | $R_{t,t+1}$ | t-stat | $R_{t,t+2}$ | t-stat | $R_{t,t+3}$ | t-stat | $R_{t,t+4}$ | t-stat |
| Low                      | -14.50    | 2.42        | (1.04) | 4.74        | (1.13) | 5.35        | (0.94) | 12.64       | (1.97) |
| Middle                   | 1.18      | 2.56        | (0.97) | 8.37        | (1.71) | 12.00       | (2.05) | 18.03       | (2.07) |
| High                     | 29.55     | 8.94        | (2.56) | 17.76       | (3.50) | 32.10       | (4.26) | 43.63       | (3.88) |
| Difference               |           | 6.52        |        | 13.02       |        | 26.75       |        | 30.99       |        |
| Ripple                   |           |             |        |             |        |             |        |             |        |
| Rank                     | Formation | $R_{t,t+1}$ | t-stat | $R_{t,t+2}$ | t-stat | $R_{t,t+3}$ | t-stat | $R_{t,t+4}$ | t-stat |
| Low                      | -15.51    | 1.30        | (0.47) | 5.88        | (1.03) | 14.75       | (1.26) | 27.61       | (1.50) |
| Middle                   | -0.97     | 0.13        | (0.08) | 5.28        | (1.60) | 19.30       | (1.80) | 22.81       | (1.94) |
| High                     | 34.00     | 16.15       | (2.16) | 28.02       | (2.42) | 31.16       | (2.73) | 42.86       | (2.86) |
| Difference               |           | 14.85       |        | 22.14       |        | 16.41       |        | 15.25       |        |

**Table A.21: Google Searches for Three Major Coins**

This table reports the time-series Google search result for each of the three major coins: Bitcoin, Ethereum, and Ripple. Panel A shows the regression results and Panel B shows the results by grouping weekly coin market returns into terciles. The first part of Panel B reports results for the whole sample. The second part of Panel B uses the first two years of data to determine the tercile cutoffs and examine the out-of-sample time-series performance. The t-statistics are reported in parentheses and are Newey-West adjusted with n-1 lags. \*, \*\*, \*\*\* denote significance levels at the 10%, 5%, and 1%. The data frequency is weekly.

| Panel A: Regression Results |                   |                   |                   |                   |                   |                   |                   |                  |
|-----------------------------|-------------------|-------------------|-------------------|-------------------|-------------------|-------------------|-------------------|------------------|
| Bitcoin                     | $R_{t,t+1}$       | $R_{t,t+2}$       | $R_{t,t+3}$       | $R_{t,t+4}$       | $R_{t,t+5}$       | $R_{t,t+6}$       | $R_{t,t+7}$       | $R_{t,t+8}$      |
|                             | (1)               | (2)               | (3)               | (4)               | (5)               | (6)               | (7)               | (8)              |
| $Google_t$                  | 0.02**<br>(2.56)  | 0.03*<br>(1.73)   | 0.03<br>(1.34)    | 0.05<br>(1.35)    | 0.05<br>(1.21)    | 0.04<br>(0.86)    | 0.03<br>(0.62)    | 0.03<br>(0.50)   |
| Cons                        | 0.03***<br>(4.08) | 0.07***<br>(3.92) | 0.11***<br>(3.48) | 0.17***<br>(3.19) | 0.23***<br>(2.94) | 0.31***<br>(2.75) | 0.39***<br>(2.59) | 0.48**<br>(2.45) |
| $R^2$                       | 0.02              | 0.01              | 0.01              | 0.01              | 0.00              | 0.00              | 0.00              | 0.00             |
| Ethereum                    |                   |                   |                   |                   |                   |                   |                   |                  |
| $Google_t$                  | 0.03<br>(1.64)    | 0.08***<br>(3.77) | 0.13***<br>(4.22) | 0.18***<br>(5.15) | 0.23***<br>(5.77) | 0.20***<br>(3.84) | 0.18***<br>(3.22) | 0.17**<br>(2.23) |
| Cons                        | 0.05***<br>(2.81) | 0.10***<br>(3.02) | 0.16***<br>(2.88) | 0.25***<br>(2.78) | 0.34***<br>(2.66) | 0.44**<br>(2.53)  | 0.56**<br>(2.44)  | 0.70**<br>(2.35) |
| $R^2$                       | 0.03              | 0.05              | 0.07              | 0.07              | 0.06              | 0.03              | 0.02              | 0.01             |
| Ripple                      |                   |                   |                   |                   |                   |                   |                   |                  |
| $Google_t$                  | 0.12***<br>(3.12) | 0.27***<br>(5.00) | 0.48***<br>(3.01) | 0.70**<br>(2.55)  | 0.59***<br>(2.72) | 0.42***<br>(3.53) | 0.44***<br>(3.23) | 0.43**<br>(2.48) |
| Cons                        | 0.06**<br>(2.22)  | 0.13***<br>(2.61) | 0.22***<br>(2.73) | 0.31***<br>(2.72) | 0.39***<br>(2.60) | 0.50**<br>(2.38)  | 0.64**<br>(2.14)  | 0.82*<br>(1.88)  |
| $R^2$                       | 0.07              | 0.13              | 0.20              | 0.23              | 0.14              | 0.05              | 0.03              | 0.02             |

  

| Panel B: Sorting Results |        |             |         |             |         |             |        |             |        |
|--------------------------|--------|-------------|---------|-------------|---------|-------------|--------|-------------|--------|
| Bitcoin                  |        |             |         |             |         |             |        |             |        |
| Rank                     | Google | $R_{t,t+1}$ | t-stat  | $R_{t,t+2}$ | t-stat  | $R_{t,t+3}$ | t-stat | $R_{t,t+4}$ | t-stat |
| Low                      | -0.45  | 0.83        | (0.87)  | 1.84        | (1.26)  | 2.51        | (1.35) | 2.48        | (1.13) |
| Middle                   | -0.01  | 1.54        | (1.59)  | 3.03        | (1.97)  | 4.75        | (2.33) | 6.12        | (2.45) |
| High                     | 0.59   | 5.77        | (3.32)  | 12.13       | (4.11)  | 19.94       | (4.35) | 30.12       | (4.93) |
| Difference               |        | 4.94        |         | 10.29       |         | 17.43       |        | 27.64       |        |
| Ethereum                 |        |             |         |             |         |             |        |             |        |
| Rank                     | Google | $R_{t,t+1}$ | t-stat  | $R_{t,t+2}$ | t-stat  | $R_{t,t+3}$ | t-stat | $R_{t,t+4}$ | t-stat |
| Low                      | -0.53  | 1.87        | (0.73)  | 3.55        | (0.91)  | 7.61        | (1.41) | 14.52       | (1.78) |
| Middle                   | -0.02  | 2.87        | (0.99)  | 5.07        | (1.11)  | 8.59        | (1.50) | 19.49       | (2.04) |
| High                     | 0.66   | 9.85        | (3.16)  | 23.80       | (4.31)  | 35.25       | (4.38) | 42.61       | (4.54) |
| Difference               |        | 7.98        |         | 20.25       |         | 27.64       |        | 28.09       |        |
| Ripple                   |        |             |         |             |         |             |        |             |        |
| Rank                     | Google | $R_{t,t+1}$ | t-stat  | $R_{t,t+2}$ | t-stat  | $R_{t,t+3}$ | t-stat | $R_{t,t+4}$ | t-stat |
| Low                      | -0.51  | -0.07       | (-0.03) | -1.32       | (-0.40) | 1.79        | (0.33) | 6.45        | (0.76) |
| Middle                   | -0.03  | 8.61        | (1.39)  | 10.71       | (1.75)  | 15.24       | (1.61) | 18.67       | (1.57) |
| High                     | 0.55   | 8.97        | (1.89)  | 29.49       | (2.64)  | 47.91       | (3.02) | 68.24       | (3.17) |
| Difference               |        | 9.04        |         | 30.81       |         | 46.12       |        | 61.79       |        |

**Table A.22: Currency Loadings of Coin Market Returns for Three Major Coins**

This table reports the factor loadings of Bitcoin returns, Ethereum returns, and Ripple returns on different currencies and currency factors. The currencies include Australian dollar, Canadian dollar, Euro, Singapore dollar, and British pound. Returns are in percentage. Results are based on monthly returns. The standard t-statistic is reported in parentheses. \*, \*\*, \*\*\* denote significance levels at the 10%, 5%, and 1% based on the standard t-statistics. The data frequency is monthly.

| Bitcoin   | (1)                | (2)                | (3)                | (4)                | (5)                | (6)                | (7)                | (8)                | (9)                |
|-----------|--------------------|--------------------|--------------------|--------------------|--------------------|--------------------|--------------------|--------------------|--------------------|
| APLHA     | 20.19***<br>(2.94) | 20.58***<br>(2.97) | 20.08***<br>(2.95) | 19.91***<br>(2.92) | 20.33***<br>(2.99) | 20.40***<br>(2.87) | 21.95***<br>(3.03) | 19.98***<br>(2.70) | 20.67***<br>(2.77) |
| AUSTRALIA | 1.62<br>(0.73)     |                    |                    |                    |                    | -0.84<br>(-0.20)   |                    |                    |                    |
| CANADA    |                    | 3.07<br>(0.79)     |                    |                    |                    | 0.95<br>(0.21)     |                    |                    |                    |
| EURO      |                    |                    | 3.04<br>(1.07)     |                    |                    | 0.81<br>(0.19)     |                    |                    |                    |
| SINGAPORE |                    |                    |                    | 4.04<br>(1.00)     |                    | 2.14<br>(0.25)     |                    |                    |                    |
| UK        |                    |                    |                    |                    | 3.68<br>(1.30)     | 2.59<br>(0.69)     |                    |                    |                    |
| DOLLAR    |                    |                    |                    |                    |                    |                    | 3.69<br>(0.90)     |                    | 3.14<br>(0.75)     |
| CARRY     |                    |                    |                    |                    |                    |                    |                    | 3.67<br>(0.89)     | 3.11<br>(0.74)     |
| $R^2$     | 0.01               | 0.01               | 0.01               | 0.01               | 0.02               | 0.02               | 0.01               | 0.01               | 0.02               |
| Ethereum  | (1)                | (2)                | (3)                | (4)                | (5)                | (6)                | (7)                | (8)                | (9)                |
| APLHA     | 22.26**<br>(2.21)  | 22.33**<br>(2.21)  | 21.84**<br>(2.25)  | 22.41**<br>(2.32)  | 22.68**<br>(2.22)  | 20.36**<br>(2.06)  | 30.13**<br>(2.70)  | 29.25**<br>(2.34)  | 28.55**<br>(2.35)  |
| AUSTRALIA | 1.65<br>(0.43)     |                    |                    |                    |                    | -9.27<br>(-1.52)   |                    |                    |                    |
| CANADA    |                    | 1.19<br>(0.23)     |                    |                    |                    | -1.14<br>(-0.19)   |                    |                    |                    |
| EURO      |                    |                    | 8.65*<br>(1.78)    |                    |                    | 6.12<br>(0.93)     |                    |                    |                    |
| SINGAPORE |                    |                    |                    | 12.49*<br>(1.89)   |                    | 23.10*<br>(1.91)   |                    |                    |                    |
| UK        |                    |                    |                    |                    | 1.13<br>(0.29)     | -3.04<br>(-0.68)   |                    |                    |                    |
| DOLLAR    |                    |                    |                    |                    |                    |                    | 12.02<br>(1.68)    |                    | 12.31<br>(1.69)    |
| CARRY     |                    |                    |                    |                    |                    |                    |                    | 1.09<br>(0.16)     | 2.36<br>(0.36)     |
| $R^2$     | 0.00               | 0.00               | 0.07               | 0.08               | 0.00               | 0.17               | 0.08               | 0.00               | 0.08               |

| Ripple    | (1)    | (2)     | (3)     | (4)    | (5)    | (6)     | (7)     | (8)     | (9)     |
|-----------|--------|---------|---------|--------|--------|---------|---------|---------|---------|
| APLHA     | 32.25* | 30.43*  | 34.75** | 32.50* | 33.05* | 31.74*  | 38.10** | 39.50*  | 41.13** |
|           | (1.89) | (1.76)  | (2.07)  | (1.92) | (1.95) | (1.82)  | (2.02)  | (1.96)  | (2.03)  |
| AUSTRALIA | 0.91   |         |         |        |        | -2.87   |         |         |         |
|           | (0.15) |         |         |        |        | (-0.27) |         |         |         |
| CANADA    |        | -3.83   |         |        |        | -8.28   |         |         |         |
|           |        | (-0.43) |         |        |        | (-0.75) |         |         |         |
| EURO      |        |         | 11.30   |        |        | 17.25   |         |         |         |
|           |        |         | (1.45)  |        |        | (1.46)  |         |         |         |
| SINGAPORE |        |         |         | 4.61   |        | -2.48   |         |         |         |
|           |        |         |         | (0.38) |        | (-0.11) |         |         |         |
| UK        |        |         |         |        | 4.66   | 0.16    |         |         |         |
|           |        |         |         |        | (0.68) | (0.02)  |         |         |         |
| DOLLAR    |        |         |         |        |        |         | 10.05   |         | 9.68    |
|           |        |         |         |        |        |         | (0.83)  |         | (0.79)  |
| CARRY     |        |         |         |        |        |         |         | -5.81   | -5.15   |
|           |        |         |         |        |        |         |         | (-0.49) | (-0.43) |
| $R^2$     | 0.00   | 0.00    | 0.03    | 0.00   | 0.01   | 0.05    | 0.01    | 0.00    | 0.02    |



**Table A.23: Commodity Loadings of Coin Market Returns for Three Major Coins**

This table reports the factor loadings of Bitcoin returns, Ethereum returns, and Ripple returns on the returns of different precious metal commodities. The commodities include gold, platinum, and silver. Returns are in percentage. The standard t-statistic is reported in parentheses. \*, \*\*, \*\*\* denote significance levels at the 10%, 5%, and 1% based on the standard t-statistics. The data frequency is monthly.

| Bitcoin  | (1)                | (2)                | (3)                | (4)                |
|----------|--------------------|--------------------|--------------------|--------------------|
| APLHA    | 19.60***<br>(2.87) | 19.08***<br>(2.75) | 19.74***<br>(2.89) | 19.52***<br>(2.78) |
| GOLD     | -0.51<br>(-0.35)   |                    |                    | -2.72<br>(-1.03)   |
| PLATINUM |                    | 0.05<br>(0.04)     |                    | -0.06<br>(-0.03)   |
| SILVER   |                    |                    | 0.39<br>(0.50)     | 1.63<br>(1.23)     |
| $R^2$    | 0.00               | 0.00               | 0.00               | 0.02               |
| Ethereum | (1)                | (2)                | (3)                | (4)                |
| APLHA    | 19.87**<br>(2.03)  | 23.77**<br>(2.32)  | 22.94**<br>(2.24)  | 20.01*<br>(1.96)   |
| GOLD     | 4.83*<br>(1.80)    |                    |                    | 9.08**<br>(2.08)   |
| PLATINUM |                    | 1.36<br>(0.76)     |                    | -0.34<br>(-0.13)   |
| SILVER   |                    |                    | 1.12<br>(0.62)     | -3.08<br>(-1.04)   |
| $R^2$    | 0.07               | 0.01               | 0.01               | 0.12               |
| Ripple   | (1)                | (2)                | (3)                | (4)                |
| APLHA    | 32.00*<br>(1.90)   | 30.16*<br>(1.75)   | 32.08*<br>(1.88)   | 29.93*<br>(1.69)   |
| GOLD     | -2.60<br>(-0.58)   |                    |                    | 2.45<br>(0.31)     |
| PLATINUM |                    | -3.03<br>(-0.92)   |                    | -2.88<br>(-0.57)   |
| SILVER   |                    |                    | -2.22<br>(-0.79)   | -1.67<br>(-0.34)   |
| $R^2$    | 0.01               | 0.01               | 0.01               | 0.02               |

**Table A.24: Coin Market Returns Loadings to Equity Factors**

This table reports the factor loadings of the coin market returns on different equity factor models. The factor models include the CAPM, the Fama-French 3-factor model, the Carhart 4-factor model, the Fama-French 5-factor model, and the Fama-French 6-factor model. The standard t-statistic is reported in parentheses and the bootstrapped t-statistic is reported in brackets. \*, \*\*, \*\*\* denote significance levels at the 10%, 5%, and 1% based on the standard t-statistics. The data frequency is monthly.

| (Percentage) | CAPM                        | 3-Fac                       | 4-Fac                       | 5-Fac                       | 6-Fac                       |
|--------------|-----------------------------|-----------------------------|-----------------------------|-----------------------------|-----------------------------|
| ALPHA        | 17.53**<br>(2.36)<br>[2.44] | 16.54**<br>(2.18)<br>[2.28] | 16.32**<br>(2.12)<br>[2.30] | 15.32**<br>(2.00)<br>[2.24] | 15.00*<br>(1.93)<br>[2.22]  |
| MKTRF        | 3.15<br>(1.50)<br>[1.49]    | 3.64<br>(1.61)<br>[1.93]    | 3.73<br>(1.61)<br>[1.83]    | 4.32*<br>(1.85)<br>[1.78]   | 4.46*<br>(1.85)<br>[1.74]   |
| SMB          |                             | -1.79<br>(-0.53)<br>[-1.08] | -1.81<br>(-0.53)<br>[-1.07] | -0.19<br>(-0.05)<br>[-0.08] | -0.19<br>(-0.05)<br>[-0.08] |
| HML          |                             | -2.38<br>(-0.68)<br>[-1.02] | -2.06<br>(-0.53)<br>[-0.70] | -3.78<br>(-0.82)<br>[-1.30] | -3.36<br>(-0.68)<br>[-1.00] |
| MOM          |                             |                             | 0.53<br>(0.19)<br>[0.28]    |                             | 0.75<br>(0.27)<br>[0.39]    |
| RMW          |                             |                             |                             | 5.61<br>(1.00)<br>[1.20]    | 5.68<br>(1.01)<br>[1.23]    |
| CMA          |                             |                             |                             | 3.57<br>(0.51)<br>[0.87]    | 3.64<br>(0.52)<br>[0.87]    |
| $R^2$        | 0.02                        | 0.03                        | 0.03                        | 0.05                        | 0.05                        |

**Table A.25: Coin Market Returns Loadings to Equity Factors for Three Major Coins**

This table reports the factor loadings of Bitcoin returns, Ethereum returns, and Ripple returns on different equity factor models. The factor models include the CAPM, the Fama-French 3-factor model, the Carhart 4-factor model, the Fama-French 5-factor model, and the Fama-French 6-factor model. The standard t-statistic is reported in parentheses. \*, \*\*, \*\*\* denote significance levels at the 10%, 5%, and 1% based on the standard t-statistics. The data frequency is monthly.

| Bitcoin  | CAPM              | 3-Fac             | 4-Fac              | 5-Fac              | 6-Fac               |
|----------|-------------------|-------------------|--------------------|--------------------|---------------------|
| ALPHA    | 16.78**<br>(2.40) | 15.89**<br>(2.23) | 15.41**<br>(2.13)  | 14.80**<br>(2.05)  | 14.23*<br>(1.94)    |
| MKTRF    | 3.11<br>(1.57)    | 3.59*<br>(1.68)   | 3.78*<br>(1.73)    | 4.14*<br>(1.88)    | 4.39*<br>(1.93)     |
| SMB      |                   | -1.83<br>(-0.57)  | -1.87<br>(-0.58)   | -0.28<br>(-0.08)   | -0.28<br>(-0.08)    |
| HML      |                   | -1.69<br>(-0.52)  | -0.99<br>(-0.27)   | -2.20<br>(-0.51)   | -1.45<br>(-0.31)    |
| MOM      |                   |                   | 1.16<br>(0.44)     |                    | 1.34<br>(0.51)      |
| RMW      |                   |                   |                    | 5.66<br>(1.08)     | 5.78<br>(1.09)      |
| CMA      |                   |                   |                    | 1.50<br>(0.23)     | 1.63<br>(0.25)      |
| $R^2$    | 0.03              | 0.03              | 0.04               | 0.05               | 0.05                |
| Ethereum | CAPM              | 3-Fac             | 4-Fac              | 5-Fac              | 6-Fac               |
| ALPHA    | 21.78**<br>(2.11) | 20.46**<br>(2.05) | 20.35**<br>(2.06)  | 18.21*<br>(1.87)   | 18.31*<br>(1.88)    |
| MKTRF    | 0.51<br>(0.18)    | 1.30<br>(0.45)    | -0.09<br>(-0.03)   | 1.81<br>(0.62)     | 0.54<br>(0.17)      |
| SMB      |                   | -4.69<br>(-1.12)  | -5.51<br>(-1.31)   | -1.50<br>(-0.33)   | -2.15<br>(-0.47)    |
| HML      |                   | -6.47<br>(-1.58)  | -9.14**<br>(-2.03) | -10.16*<br>(-2.01) | -10.94**<br>(-2.13) |
| MOM      |                   |                   | -5.03<br>(-1.36)   |                    | -3.57<br>(-0.91)    |
| RMW      |                   |                   |                    | 12.35*<br>(1.69)   | 12.02<br>(1.64)     |
| CMA      |                   |                   |                    | 7.77<br>(0.98)     | 5.02<br>(0.59)      |
| $R^2$    | 0.00              | 0.12              | 0.16               | 0.21               | 0.23                |
| Ripple   | CAPM              | 3-Fac             | 4-Fac              | 5-Fac              | 6-Fac               |
| ALPHA    | 30.87*<br>(1.76)  | 29.03<br>(1.62)   | 30.10*<br>(1.67)   | 30.17*<br>(1.69)   | 30.53*<br>(1.69)    |
| MKTRF    | 1.22<br>(0.24)    | 1.22<br>(0.23)    | 0.08<br>(0.01)     | 3.00<br>(0.55)     | 2.50<br>(0.43)      |
| SMB      |                   | -0.91<br>(-0.13)  | -0.97<br>(-0.14)   | 1.24<br>(0.16)     | 1.13<br>(0.14)      |
| HML      |                   | -6.32<br>(-0.84)  | -9.45<br>(-1.08)   | -17.99*<br>(-1.78) | -18.69*<br>(-1.78)  |
| MOM      |                   |                   | -4.48<br>(-0.71)   |                    | -1.69<br>(-0.26)    |
| RMW      |                   |                   |                    | 5.00<br>(0.38)     | 4.79<br>(0.36)      |
| CMA      |                   |                   |                    | 26.14<br>(1.61)    | 25.07<br>(1.49)     |
| $R^2$    | 0.00              | 0.01              | 0.02               | 0.06               | 0.06                |

**Table A.26: Macro Factor Loadings of Coin Market Returns and Three Major Coins**

This table reports the factor loadings of the coin market returns, Bitcoin returns, Ethereum returns, and Ripple returns on different macroeconomic factors. The macroeconomic factors include log non-durable consumption growth, log durable consumption growth, log industrial production growth, and log personal income growth. The standard t-statistic is reported in parentheses and the bootstrapped t-statistic is reported in brackets. \*, \*\*, \*\*\* denote significance levels at the 10%, 5%, and 1% based on the standard t-statistics. The data frequency is monthly.

| CMKT            | (1)                       | (2)                          | (3)                          | (4)                          | (5)                       | (6)                          | (7)                         | (8)                         |
|-----------------|---------------------------|------------------------------|------------------------------|------------------------------|---------------------------|------------------------------|-----------------------------|-----------------------------|
| ALPHA           | 13.38<br>(1.07)<br>[1.57] | 23.26***<br>(3.04)<br>[2.46] | 20.83***<br>(2.75)<br>[2.32] | 22.46***<br>(2.73)<br>[2.64] | 13.40<br>(1.07)<br>[1.55] | 20.63***<br>(2.67)<br>[2.51] | 17.76**<br>(2.27)<br>[2.32] | 19.08**<br>(2.24)<br>[2.60] |
| $\Delta c^{nd}$ | 21.75<br>(0.69)<br>[0.74] |                              |                              |                              | 13.26<br>(0.41)<br>[0.44] |                              |                             |                             |
| $\Delta c^d$    |                           | -8.74<br>(-1.12)<br>[-1.19]  |                              |                              |                           | -10.71<br>(-1.37)<br>[-1.43] |                             |                             |
| $\Delta indpro$ |                           |                              | -3.05<br>(-0.20)<br>[-0.28]  |                              |                           |                              | -1.54<br>(-0.10)<br>[-0.13] |                             |
| $\Delta pi$     |                           |                              |                              | -5.90<br>(-0.53)<br>[-0.75]  |                           |                              |                             | -4.22<br>(-0.38)<br>[-0.54] |
| MKTRF           |                           |                              |                              |                              | 2.98<br>(1.38)<br>[1.44]  | 3.59*<br>(1.69)<br>[1.73]    | 3.14<br>(1.48)<br>[1.43]    | 3.07<br>(1.44)<br>[1.42]    |
| R-Squared       | 0.00                      | 0.01                         | 0.00                         | 0.00                         | 0.03                      | 0.04                         | 0.02                        | 0.02                        |
| Bitcoin         | (1)                       | (2)                          | (3)                          | (4)                          | (5)                       | (6)                          | (7)                         | (8)                         |
| ALPHA           | 12.82<br>(1.09)           | 22.22***<br>(3.08)           | 20.05***<br>(2.81)           | 21.62***<br>(2.79)           | 12.85<br>(1.09)           | 19.65***<br>(2.70)           | 17.03**<br>(2.32)           | 18.29**<br>(2.29)           |
| $\Delta c^{nd}$ | 21.02<br>(0.70)           |                              |                              |                              | 12.64<br>(0.42)           |                              |                             |                             |
| $\Delta c^d$    |                           | -7.99<br>(-1.09)             |                              |                              |                           | -9.92<br>(-1.35)             |                             |                             |
| $\Delta indpro$ |                           |                              | -3.12<br>(-0.21)             |                              |                           |                              | -1.64<br>(-0.11)            |                             |
| $\Delta pi$     |                           |                              |                              | -5.76<br>(-0.55)             |                           |                              |                             | -4.11<br>(-0.39)            |
| MKTRF           |                           |                              |                              |                              | 2.95<br>(1.45)            | 3.51*<br>(1.76)              | 3.09<br>(1.55)              | 3.03<br>(1.51)              |
| R-Squared       | 0.01                      | 0.01                         | 0.00                         | 0.00                         | 0.03                      | 0.04                         | 0.03                        | 0.03                        |

| Ethereum        | (1)              | (2)               | (3)               | (4)               | (5)               | (6)               | (7)               | (8)               |
|-----------------|------------------|-------------------|-------------------|-------------------|-------------------|-------------------|-------------------|-------------------|
| ALPHA           | 26.47<br>(1.40)  | 24.66**<br>(2.30) | 23.92**<br>(2.26) | 35.33*<br>(1.78)  | 27.20<br>(1.42)   | 24.01**<br>(2.20) | 23.14**<br>(2.12) | 33.91<br>(1.64)   |
| $\Delta c^{nd}$ | -9.57<br>(-0.21) |                   |                   |                   | -14.08<br>(-0.29) |                   |                   |                   |
| $\Delta c^d$    |                  | -5.19<br>(-0.48)  |                   |                   |                   | -5.81<br>(-0.53)  |                   |                   |
| $\Delta indpro$ |                  |                   | -5.57<br>(-0.29)  |                   |                   |                   | -4.54<br>(-0.23)  |                   |
| $\Delta pi$     |                  |                   |                   | -38.04<br>(-0.71) |                   |                   |                   | -35.18<br>(-0.64) |
| MKTRF           |                  |                   |                   |                   | 1.39<br>(0.46)    | 1.40<br>(0.47)    | 1.12<br>(0.38)    | 0.87<br>(0.29)    |
| R-Squared       | 0.00             | 0.01              | 0.00              | 0.01              | 0.01              | 0.01              | 0.01              | 0.02              |
| Ripple          | (1)              | (2)               | (3)               | (4)               | (5)               | (6)               | (7)               | (8)               |
| ALPHA           | 25.21<br>(0.76)  | 34.65*<br>(1.91)  | 27.58<br>(1.58)   | 32.73<br>(0.91)   | 26.38<br>(0.78)   | 33.33*<br>(1.80)  | 25.89<br>(1.43)   | 30.32<br>(0.83)   |
| $\Delta c^{nd}$ | 21.13<br>(0.26)  |                   |                   |                   | 14.40<br>(0.17)   |                   |                   |                   |
| $\Delta c^d$    |                  | -6.10<br>(-0.35)  |                   |                   |                   | -7.07<br>(-0.39)  |                   |                   |
| $\Delta indpro$ |                  |                   | 40.91<br>(1.22)   |                   |                   |                   | 41.44<br>(1.23)   |                   |
| $\Delta pi$     |                  |                   |                   | -0.24<br>(-0.00)  |                   |                   |                   | 2.42<br>(0.03)    |
| MKTRF           |                  |                   |                   |                   | 1.55<br>(0.28)    | 2.12<br>(0.39)    | 2.09<br>(0.39)    | 1.84<br>(0.34)    |
| R-Squared       | 0.00             | 0.00              | 0.02              | 0.00              | 0.00              | 0.00              | 0.03              | 0.00              |

**Table A.27: Coin Market Return Exposures to the Factor Zoo**

This table reports results of exposures of the coin market returns to factors in the factor zoo. Each column reports the coefficient estimates of regressing the coin market returns to contemporaneous stock market returns and one of the factors in the factor zoo. \*, \*\*, \*\*\* denote significance levels at the 10%, 5%, and 1%. The data frequency is monthly.

| (Percentage)       | (1)    | (2)    | (3)    | (4)     | (5)     | (6)    | (7)     | (8)     | (9)    | (10)   | (11)   | (12)   | (13)   | (14)    | (15)   |
|--------------------|--------|--------|--------|---------|---------|--------|---------|---------|--------|--------|--------|--------|--------|---------|--------|
| mktrf              | 4.22   | 4.35   | 3.81   | 3.64    | 4.22    | 3.54   | 3.62    | 3.79    | 3.58   | 3.60   | 3.60   | 3.81   | 3.80   | 3.28    | 3.62   |
|                    | (1.55) | (1.56) | (1.39) | (1.34)  | (1.33)  | (1.28) | (1.33)  | (1.39)  | (1.31) | (1.33) | (1.33) | (1.40) | (0.93) | (1.16)  | (1.33) |
| abnormalaccruals   | 9.48   |        |        |         |         |        |         |         |        |        |        |        |        |         |        |
|                    | (1.27) |        |        |         |         |        |         |         |        |        |        |        |        |         |        |
| accruals           |        | 9.83   |        |         |         |        |         |         |        |        |        |        |        |         |        |
|                    |        | (1.02) |        |         |         |        |         |         |        |        |        |        |        |         |        |
| accrualsbm         |        |        | 1.35   |         |         |        |         |         |        |        |        |        |        |         |        |
|                    |        |        | (0.47) |         |         |        |         |         |        |        |        |        |        |         |        |
| adexp              |        |        |        | -0.13   |         |        |         |         |        |        |        |        |        |         |        |
|                    |        |        |        | (-0.02) |         |        |         |         |        |        |        |        |        |         |        |
| announcementreturn |        |        |        |         | -0.89   |        |         |         |        |        |        |        |        |         |        |
|                    |        |        |        |         | (-0.22) |        |         |         |        |        |        |        |        |         |        |
| assetgrowth        |        |        |        |         |         | 1.02   |         |         |        |        |        |        |        |         |        |
|                    |        |        |        |         |         | (0.22) |         |         |        |        |        |        |        |         |        |
| assetturnover      |        |        |        |         |         |        | -0.21   |         |        |        |        |        |        |         |        |
|                    |        |        |        |         |         |        | (-0.05) |         |        |        |        |        |        |         |        |
| bm                 |        |        |        |         |         |        |         | -1.68   |        |        |        |        |        |         |        |
|                    |        |        |        |         |         |        |         | (-0.60) |        |        |        |        |        |         |        |
| bpebm              |        |        |        |         |         |        |         |         | 1.76   |        |        |        |        |         |        |
|                    |        |        |        |         |         |        |         |         | (0.30) |        |        |        |        |         |        |
| beta               |        |        |        |         |         |        |         |         |        | 1.04   |        |        |        |         |        |
|                    |        |        |        |         |         |        |         |         |        | (0.49) |        |        |        |         |        |
| betasquared        |        |        |        |         |         |        |         |         |        |        | 1.03   |        |        |         |        |
|                    |        |        |        |         |         |        |         |         |        |        | (0.49) |        |        |         |        |
| betatailrisk       |        |        |        |         |         |        |         |         |        |        |        | 2.00   |        |         |        |
|                    |        |        |        |         |         |        |         |         |        |        |        | (0.80) |        |         |        |
| bidaskspread       |        |        |        |         |         |        |         |         |        |        |        |        | 2.11   |         |        |
|                    |        |        |        |         |         |        |         |         |        |        |        |        | (0.65) |         |        |
| cboperprof         |        |        |        |         |         |        |         |         |        |        |        |        |        | -1.59   |        |
|                    |        |        |        |         |         |        |         |         |        |        |        |        |        | (-0.47) |        |
| cf                 |        |        |        |         |         |        |         |         |        |        |        |        |        |         | 0.41   |
|                    |        |        |        |         |         |        |         |         |        |        |        |        |        |         | (0.11) |

| (Percentage)       | (16)   | (17)   | (18)   | (19)    | (20)   | (21)    | (22)    | (23)   | (24)   | (25)    | (26)    | (27)    | (28)    | (29)    | (30)    |
|--------------------|--------|--------|--------|---------|--------|---------|---------|--------|--------|---------|---------|---------|---------|---------|---------|
| mktrf              | 3.53   | 3.65   | 3.62   | 3.89    | 3.64   | 4.03    | 4.12    | 3.65   | 3.66   | 3.58    | 3.57    | 3.65    | 3.71    | 3.59    | 3.91    |
|                    | (1.30) | (1.32) | (1.32) | (1.44)  | (1.34) | (1.48)  | (1.53)  | (1.34) | (1.33) | (1.31)  | (1.31)  | (1.34)  | (1.36)  | (1.33)  | (1.44)  |
| cash               | 1.79   |        |        |         |        |         |         |        |        |         |         |         |         |         |         |
|                    | (0.58) |        |        |         |        |         |         |        |        |         |         |         |         |         |         |
| chassetturnover    |        | 0.22   |        |         |        |         |         |        |        |         |         |         |         |         |         |
|                    |        | (0.03) |        |         |        |         |         |        |        |         |         |         |         |         |         |
| cheq               |        |        | 0.26   |         |        |         |         |        |        |         |         |         |         |         |         |
|                    |        |        | (0.05) |         |        |         |         |        |        |         |         |         |         |         |         |
| chforecastaccrual  |        |        |        | -7.13   |        |         |         |        |        |         |         |         |         |         |         |
|                    |        |        |        | (-1.03) |        |         |         |        |        |         |         |         |         |         |         |
| chinv              |        |        |        |         | 1.43   |         |         |        |        |         |         |         |         |         |         |
|                    |        |        |        |         | (0.18) |         |         |        |        |         |         |         |         |         |         |
| chinvia            |        |        |        |         |        | -6.61   |         |        |        |         |         |         |         |         |         |
|                    |        |        |        |         |        | (-1.03) |         |        |        |         |         |         |         |         |         |
| chnanalyst         |        |        |        |         |        |         | -15.20  |        |        |         |         |         |         |         |         |
|                    |        |        |        |         |        |         | (-1.45) |        |        |         |         |         |         |         |         |
| chncoa             |        |        |        |         |        |         |         | 2.05   |        |         |         |         |         |         |         |
|                    |        |        |        |         |        |         |         | (0.22) |        |         |         |         |         |         |         |
| chnwc              |        |        |        |         |        |         |         |        | 0.57   |         |         |         |         |         |         |
|                    |        |        |        |         |        |         |         |        | (0.06) |         |         |         |         |         |         |
| chpm               |        |        |        |         |        |         |         |        |        | -2.11   |         |         |         |         |         |
|                    |        |        |        |         |        |         |         |        |        | (-0.26) |         |         |         |         |         |
| chtax              |        |        |        |         |        |         |         |        |        |         | -2.79   |         |         |         |         |
|                    |        |        |        |         |        |         |         |        |        |         | (-0.48) |         |         |         |         |
| changeinrec        |        |        |        |         |        |         |         |        |        |         |         | -2.50   |         |         |         |
|                    |        |        |        |         |        |         |         |        |        |         |         | (-0.41) |         |         |         |
| compositedebtissue |        |        |        |         |        |         |         |        |        |         |         |         | -1.50   |         |         |
|                    |        |        |        |         |        |         |         |        |        |         |         |         | (-0.24) |         |         |
| consrecomm         |        |        |        |         |        |         |         |        |        |         |         |         |         | -2.88   |         |
|                    |        |        |        |         |        |         |         |        |        |         |         |         |         | (-0.83) |         |
| convdebt           |        |        |        |         |        |         |         |        |        |         |         |         |         |         | -4.74   |
|                    |        |        |        |         |        |         |         |        |        |         |         |         |         |         | (-0.84) |

| (Percentage) | (31)             | (32)             | (33)             | (34)             | (35)             | (36)           | (37)           | (38)              | (39)           | (40)             | (41)           | (42)             | (43)             | (44)             | (45)             |
|--------------|------------------|------------------|------------------|------------------|------------------|----------------|----------------|-------------------|----------------|------------------|----------------|------------------|------------------|------------------|------------------|
| mktrf        | 3.68<br>(1.30)   | 3.63<br>(1.33)   | 4.28<br>(1.33)   | 3.65<br>(1.34)   | 3.98<br>(1.44)   | 3.77<br>(1.38) | 3.50<br>(1.26) | 3.77<br>(1.40)    | 3.69<br>(1.36) | 3.17<br>(1.16)   | 3.67<br>(1.35) | 2.62<br>(0.94)   | 3.35<br>(1.23)   | 4.14<br>(1.45)   | 3.80<br>(1.39)   |
| credratdg    | -0.48<br>(-0.28) |                  |                  |                  |                  |                |                |                   |                |                  |                |                  |                  |                  |                  |
| debtissuance |                  | -0.89<br>(-0.10) |                  |                  |                  |                |                |                   |                |                  |                |                  |                  |                  |                  |
| delbreadth   |                  |                  | -2.02<br>(-0.40) |                  |                  |                |                |                   |                |                  |                |                  |                  |                  |                  |
| delcoa       |                  |                  |                  | -1.01<br>(-0.15) |                  |                |                |                   |                |                  |                |                  |                  |                  |                  |
| delcol       |                  |                  |                  |                  | -3.63<br>(-0.60) |                |                |                   |                |                  |                |                  |                  |                  |                  |
| deldrc       |                  |                  |                  |                  |                  | 2.53<br>(0.46) |                |                   |                |                  |                |                  |                  |                  |                  |
| delequ       |                  |                  |                  |                  |                  |                | 1.52<br>(0.27) |                   |                |                  |                |                  |                  |                  |                  |
| delfnl       |                  |                  |                  |                  |                  |                |                | -12.77<br>(-1.36) |                |                  |                |                  |                  |                  |                  |
| dellti       |                  |                  |                  |                  |                  |                |                |                   | 9.63<br>(0.84) |                  |                |                  |                  |                  |                  |
| divind       |                  |                  |                  |                  |                  |                |                |                   |                | -6.48<br>(-1.15) |                |                  |                  |                  |                  |
| divinit      |                  |                  |                  |                  |                  |                |                |                   |                |                  | 2.46<br>(0.48) |                  |                  |                  |                  |
| divomit      |                  |                  |                  |                  |                  |                |                |                   |                |                  |                | -7.48<br>(-1.39) |                  |                  |                  |
| divyield     |                  |                  |                  |                  |                  |                |                |                   |                |                  |                |                  | -3.43<br>(-0.96) |                  |                  |
| dolvol       |                  |                  |                  |                  |                  |                |                |                   |                |                  |                |                  |                  | -1.94<br>(-0.57) |                  |
| downforecast |                  |                  |                  |                  |                  |                |                |                   |                |                  |                |                  |                  |                  | -3.71<br>(-0.55) |



| (Percentage)        | (46)    | (47)    | (48)   | (49)    | (50)   | (51)    | (52)   | (53)   | (54)    | (55)   | (56)   | (57)    | (58)    | (59)   | (60)    |
|---------------------|---------|---------|--------|---------|--------|---------|--------|--------|---------|--------|--------|---------|---------|--------|---------|
| mktrf               | 3.64    | 3.67    | 3.52   | 3.53    | 3.54   | 3.60    | 3.53   | 3.50   | 4.14    | 4.23   | 3.63   | 3.28    | 3.67    | 4.52   | 3.86    |
|                     | (1.34)  | (1.35)  | (1.29) | (1.29)  | (1.30) | (1.33)  | (1.30) | (1.27) | (1.49)  | (1.33) | (1.30) | (1.19)  | (1.35)  | (1.65) | (1.45)  |
| ebm                 | -4.75   |         |        |         |        |         |        |        |         |        |        |         |         |        |         |
|                     | (-0.68) |         |        |         |        |         |        |        |         |        |        |         |         |        |         |
| ep                  |         | -1.57   |        |         |        |         |        |        |         |        |        |         |         |        |         |
|                     |         | (-0.31) |        |         |        |         |        |        |         |        |        |         |         |        |         |
| earnsupbig          |         |         | 2.14   |         |        |         |        |        |         |        |        |         |         |        |         |
|                     |         |         | (0.48) |         |        |         |        |        |         |        |        |         |         |        |         |
| earningsconsistency |         |         |        | -2.58   |        |         |        |        |         |        |        |         |         |        |         |
|                     |         |         |        | (-0.49) |        |         |        |        |         |        |        |         |         |        |         |
| earnings surprise   |         |         |        |         | 2.12   |         |        |        |         |        |        |         |         |        |         |
|                     |         |         |        |         | (0.34) |         |        |        |         |        |        |         |         |        |         |
| entmult             |         |         |        |         |        | -3.65   |        |        |         |        |        |         |         |        |         |
|                     |         |         |        |         |        | (-0.81) |        |        |         |        |        |         |         |        |         |
| exchswitch          |         |         |        |         |        |         | 1.59   |        |         |        |        |         |         |        |         |
|                     |         |         |        |         |        |         | (0.69) |        |         |        |        |         |         |        |         |
| exclexp             |         |         |        |         |        |         |        | 1.75   |         |        |        |         |         |        |         |
|                     |         |         |        |         |        |         |        | (0.28) |         |        |        |         |         |        |         |
| fr                  |         |         |        |         |        |         |        |        | -5.42   |        |        |         |         |        |         |
|                     |         |         |        |         |        |         |        |        | (-0.85) |        |        |         |         |        |         |
| failureprobability  |         |         |        |         |        |         |        |        |         | 0.61   |        |         |         |        |         |
|                     |         |         |        |         |        |         |        |        |         | (0.12) |        |         |         |        |         |
| firmagemom          |         |         |        |         |        |         |        |        |         |        | 0.03   |         |         |        |         |
|                     |         |         |        |         |        |         |        |        |         |        | (0.01) |         |         |        |         |
| forecastdispersion  |         |         |        |         |        |         |        |        |         |        |        | -2.15   |         |        |         |
|                     |         |         |        |         |        |         |        |        |         |        |        | (-0.70) |         |        |         |
| frontier            |         |         |        |         |        |         |        |        |         |        |        |         | -0.45   |        |         |
|                     |         |         |        |         |        |         |        |        |         |        |        |         | (-0.16) |        |         |
| gp                  |         |         |        |         |        |         |        |        |         |        |        |         |         | 6.50   |         |
|                     |         |         |        |         |        |         |        |        |         |        |        |         |         | (1.47) |         |
| gradexp             |         |         |        |         |        |         |        |        |         |        |        |         |         |        | -16.07* |
|                     |         |         |        |         |        |         |        |        |         |        |        |         |         |        | (-1.80) |

| (Percentage)       | (61)    | (62)   | (63)   | (64)   | (65)    | (66)    | (67)    | (68)    | (69)    | (70)    | (71)   | (72)   | (73)   | (74)    | (75)    |
|--------------------|---------|--------|--------|--------|---------|---------|---------|---------|---------|---------|--------|--------|--------|---------|---------|
| mktrf              | 3.73    | 3.59   | 3.96   | 3.90   | 4.12    | 3.64    | 4.12    | 3.65    | 4.64    | 3.04    | 3.44   | 3.68   | 3.78   | 3.80    | 3.65    |
|                    | (1.37)  | (1.32) | (1.43) | (1.43) | (1.47)  | (1.34)  | (1.30)  | (1.14)  | (1.42)  | (1.08)  | (1.25) | (1.35) | (1.38) | (1.40)  | (1.35)  |
| grgmtogrsales      | -3.22   |        |        |        |         |         |         |         |         |         |        |        |        |         |         |
|                    | (-0.57) |        |        |        |         |         |         |         |         |         |        |        |        |         |         |
| grltnoa            |         | 3.10   |        |        |         |         |         |         |         |         |        |        |        |         |         |
|                    |         | (0.37) |        |        |         |         |         |         |         |         |        |        |        |         |         |
| grsaletogrinv      |         |        | 4.83   |        |         |         |         |         |         |         |        |        |        |         |         |
|                    |         |        | (0.63) |        |         |         |         |         |         |         |        |        |        |         |         |
| grsaletogroverhead |         |        |        | 4.07   |         |         |         |         |         |         |        |        |        |         |         |
|                    |         |        |        | (0.81) |         |         |         |         |         |         |        |        |        |         |         |
| herf               |         |        |        |        | -4.07   |         |         |         |         |         |        |        |        |         |         |
|                    |         |        |        |        | (-0.72) |         |         |         |         |         |        |        |        |         |         |
| high52             |         |        |        |        |         | -0.02   |         |         |         |         |        |        |        |         |         |
|                    |         |        |        |        |         | (-0.01) |         |         |         |         |        |        |        |         |         |
| io_shortinterest   |         |        |        |        |         |         | -11.65  |         |         |         |        |        |        |         |         |
|                    |         |        |        |        |         |         | (-1.48) |         |         |         |        |        |        |         |         |
| idiorisk           |         |        |        |        |         |         |         | -2.70   |         |         |        |        |        |         |         |
|                    |         |        |        |        |         |         |         | (-1.02) |         |         |        |        |        |         |         |
| illiquidity        |         |        |        |        |         |         |         |         | -3.42   |         |        |        |        |         |         |
|                    |         |        |        |        |         |         |         |         | (-0.55) |         |        |        |        |         |         |
| indipo             |         |        |        |        |         |         |         |         |         | -2.90   |        |        |        |         |         |
|                    |         |        |        |        |         |         |         |         |         | (-0.78) |        |        |        |         |         |
| indmom             |         |        |        |        |         |         |         |         |         |         | 1.67   |        |        |         |         |
|                    |         |        |        |        |         |         |         |         |         |         | (0.52) |        |        |         |         |
| indretbig          |         |        |        |        |         |         |         |         |         |         |        | 0.94   |        |         |         |
|                    |         |        |        |        |         |         |         |         |         |         |        | (0.33) |        |         |         |
| intmom             |         |        |        |        |         |         |         |         |         |         |        |        | 1.08   |         |         |
|                    |         |        |        |        |         |         |         |         |         |         |        |        | (0.39) |         |         |
| intanbm            |         |        |        |        |         |         |         |         |         |         |        |        |        | -2.00   |         |
|                    |         |        |        |        |         |         |         |         |         |         |        |        |        | (-0.69) |         |
| intancfp           |         |        |        |        |         |         |         |         |         |         |        |        |        |         | -3.59   |
|                    |         |        |        |        |         |         |         |         |         |         |        |        |        |         | (-0.81) |

| (Percentage)      | (76)             | (77)           | (78)             | (79)              | (80)             | (81)           | (82)             | (83)           | (84)           | (85)             | (86)             | (87)           | (88)             | (89)             | (90)             |
|-------------------|------------------|----------------|------------------|-------------------|------------------|----------------|------------------|----------------|----------------|------------------|------------------|----------------|------------------|------------------|------------------|
| mktrf             | 3.54<br>(1.32)   | 3.64<br>(1.33) | 3.79<br>(1.37)   | 3.17<br>(1.19)    | 3.95<br>(1.45)   | 3.35<br>(1.20) | 3.88<br>(1.22)   | 3.61<br>(1.33) | 3.62<br>(1.33) | 3.67<br>(1.34)   | 3.58<br>(1.31)   | 3.51<br>(1.29) | 3.80<br>(1.39)   | 3.98<br>(1.38)   | 3.54<br>(1.31)   |
| intanep           | -7.06<br>(-1.35) |                |                  |                   |                  |                |                  |                |                |                  |                  |                |                  |                  |                  |
| intansp           |                  | 0.01<br>(0.00) |                  |                   |                  |                |                  |                |                |                  |                  |                |                  |                  |                  |
| investment        |                  |                | -2.63<br>(-0.30) |                   |                  |                |                  |                |                |                  |                  |                |                  |                  |                  |
| kz                |                  |                |                  | -9.99*<br>(-1.71) |                  |                |                  |                |                |                  |                  |                |                  |                  |                  |
| leverage          |                  |                |                  |                   | -3.00<br>(-0.95) |                |                  |                |                |                  |                  |                |                  |                  |                  |
| ms                |                  |                |                  |                   |                  | 1.77<br>(0.49) |                  |                |                |                  |                  |                |                  |                  |                  |
| maxret            |                  |                |                  |                   |                  |                | -2.42<br>(-0.83) |                |                |                  |                  |                |                  |                  |                  |
| meanrankrevgrowth |                  |                |                  |                   |                  |                |                  | 1.19<br>(0.23) |                |                  |                  |                |                  |                  |                  |
| mom12m            |                  |                |                  |                   |                  |                |                  |                | 0.84<br>(0.40) |                  |                  |                |                  |                  |                  |
| mom18m13m         |                  |                |                  |                   |                  |                |                  |                |                | -0.37<br>(-0.11) |                  |                |                  |                  |                  |
| mom1m             |                  |                |                  |                   |                  |                |                  |                |                |                  | -0.62<br>(-0.22) |                |                  |                  |                  |
| mom36m            |                  |                |                  |                   |                  |                |                  |                |                |                  |                  | 1.20<br>(0.45) |                  |                  |                  |
| mom6m             |                  |                |                  |                   |                  |                |                  |                |                |                  |                  |                | -1.42<br>(-0.46) |                  |                  |
| mom6mjunk         |                  |                |                  |                   |                  |                |                  |                |                |                  |                  |                |                  | -0.79<br>(-0.28) |                  |
| momrev            |                  |                |                  |                   |                  |                |                  |                |                |                  |                  |                |                  |                  | -1.35<br>(-0.70) |

| (Percentage)     | (91)    | (92)    | (93)    | (94)    | (95)    | (96)    | (97)    | (98)    | (99)   | (100)   | (101)   | (102)   | (103)  | (104)   | (105)  |
|------------------|---------|---------|---------|---------|---------|---------|---------|---------|--------|---------|---------|---------|--------|---------|--------|
| mktrf            | 3.88    | 3.66    | 3.79    | 3.63    | 3.85    | 3.39    | 3.42    | 3.58    | 4.63*  | 3.10    | 3.42    | 4.21    | 3.91   | 2.96    | 3.67   |
|                  | (1.36)  | (1.35)  | (1.38)  | (1.34)  | (1.40)  | (1.24)  | (1.25)  | (1.31)  | (1.72) | (1.12)  | (1.26)  | (1.44)  | (1.34) | (1.08)  | (1.37) |
| momseas          | -1.34   |         |         |         |         |         |         |         |        |         |         |         |        |         |        |
|                  | (-0.29) |         |         |         |         |         |         |         |        |         |         |         |        |         |        |
| momvol           |         | -0.61   |         |         |         |         |         |         |        |         |         |         |        |         |        |
|                  |         | (-0.35) |         |         |         |         |         |         |        |         |         |         |        |         |        |
| noa              |         |         | -1.65   |         |         |         |         |         |        |         |         |         |        |         |        |
|                  |         |         | (-0.40) |         |         |         |         |         |        |         |         |         |        |         |        |
| netdebtfinance   |         |         |         | -1.94   |         |         |         |         |        |         |         |         |        |         |        |
|                  |         |         |         | (-0.21) |         |         |         |         |        |         |         |         |        |         |        |
| netdebtprice     |         |         |         |         | -1.49   |         |         |         |        |         |         |         |        |         |        |
|                  |         |         |         |         | (-0.53) |         |         |         |        |         |         |         |        |         |        |
| netequityfinance |         |         |         |         |         | -2.08   |         |         |        |         |         |         |        |         |        |
|                  |         |         |         |         |         | (-0.59) |         |         |        |         |         |         |        |         |        |
| netpayoutyield   |         |         |         |         |         |         | -1.79   |         |        |         |         |         |        |         |        |
|                  |         |         |         |         |         |         | (-0.62) |         |        |         |         |         |        |         |        |
| numearnincrease  |         |         |         |         |         |         |         | -1.63   |        |         |         |         |        |         |        |
|                  |         |         |         |         |         |         |         | (-0.24) |        |         |         |         |        |         |        |
| opleverage       |         |         |         |         |         |         |         |         | 9.50*  |         |         |         |        |         |        |
|                  |         |         |         |         |         |         |         |         | (1.96) |         |         |         |        |         |        |
| oscore           |         |         |         |         |         |         |         |         |        | -3.79   |         |         |        |         |        |
|                  |         |         |         |         |         |         |         |         |        | (-0.92) |         |         |        |         |        |
| operprof         |         |         |         |         |         |         |         |         |        |         | -2.70   |         |        |         |        |
|                  |         |         |         |         |         |         |         |         |        |         | (-0.69) |         |        |         |        |
| optionvolume1    |         |         |         |         |         |         |         |         |        |         |         | -5.41   |        |         |        |
|                  |         |         |         |         |         |         |         |         |        |         |         | (-0.93) |        |         |        |
| optionvolume2    |         |         |         |         |         |         |         |         |        |         |         |         | 0.39   |         |        |
|                  |         |         |         |         |         |         |         |         |        |         |         |         | (0.04) |         |        |
| orderbacklog     |         |         |         |         |         |         |         |         |        |         |         |         |        | -7.32   |        |
|                  |         |         |         |         |         |         |         |         |        |         |         |         |        | (-1.29) |        |
| orgcap           |         |         |         |         |         |         |         |         |        |         |         |         |        |         | 3.21   |
|                  |         |         |         |         |         |         |         |         |        |         |         |         |        |         | (1.60) |

| (Percentage)  | (106)   | (107)   | (108)   | (109)  | (110)  | (111)  | (112)   | (113)   | (114)  | (115)   | (116)  | (117)   | (118)  | (119)  | (120)   |
|---------------|---------|---------|---------|--------|--------|--------|---------|---------|--------|---------|--------|---------|--------|--------|---------|
| mktrf         | 3.27    | 3.65    | 3.69    | 3.57   | 3.70   | 3.58   | 4.24    | 3.28    | 3.65   | 3.16    | 3.29   | 3.71    | 3.55   | 3.56   | 4.51    |
|               | (1.20)  | (1.34)  | (1.36)  | (1.31) | (1.39) | (1.30) | (1.36)  | (1.19)  | (1.35) | (1.15)  | (1.20) | (1.36)  | (1.31) | (1.30) | (1.41)  |
| pm            | -3.39   |         |         |        |        |        |         |         |        |         |        |         |        |        |         |
|               | (-0.93) |         |         |        |        |        |         |         |        |         |        |         |        |        |         |
| ps            |         | -0.67   |         |        |        |        |         |         |        |         |        |         |        |        |         |
|               |         | (-0.25) |         |        |        |        |         |         |        |         |        |         |        |        |         |
| payoutyield   |         |         | -3.41   |        |        |        |         |         |        |         |        |         |        |        |         |
|               |         |         | (-0.65) |        |        |        |         |         |        |         |        |         |        |        |         |
| pctacc        |         |         |         | 2.40   |        |        |         |         |        |         |        |         |        |        |         |
|               |         |         |         | (0.31) |        |        |         |         |        |         |        |         |        |        |         |
| pettotacc     |         |         |         |        | 14.71* |        |         |         |        |         |        |         |        |        |         |
|               |         |         |         |        | (1.90) |        |         |         |        |         |        |         |        |        |         |
| price         |         |         |         |        |        | 0.37   |         |         |        |         |        |         |        |        |         |
|               |         |         |         |        |        | (0.17) |         |         |        |         |        |         |        |        |         |
| pricedelay    |         |         |         |        |        |        | -0.90   |         |        |         |        |         |        |        |         |
|               |         |         |         |        |        |        | (-0.07) |         |        |         |        |         |        |        |         |
| profitability |         |         |         |        |        |        |         | -2.05   |        |         |        |         |        |        |         |
|               |         |         |         |        |        |        |         | (-0.76) |        |         |        |         |        |        |         |
| rd            |         |         |         |        |        |        |         |         | 2.95   |         |        |         |        |        |         |
|               |         |         |         |        |        |        |         |         | (0.89) |         |        |         |        |        |         |
| rdipo         |         |         |         |        |        |        |         |         |        | -5.42   |        |         |        |        |         |
|               |         |         |         |        |        |        |         |         |        | (-1.03) |        |         |        |        |         |
| rds           |         |         |         |        |        |        |         |         |        |         | 2.77   |         |        |        |         |
|               |         |         |         |        |        |        |         |         |        |         | (0.74) |         |        |        |         |
| rev6          |         |         |         |        |        |        |         |         |        |         |        | -1.91   |        |        |         |
|               |         |         |         |        |        |        |         |         |        |         |        | (-0.37) |        |        |         |
| rio_bm        |         |         |         |        |        |        |         |         |        |         |        |         | 3.72   |        |         |
|               |         |         |         |        |        |        |         |         |        |         |        |         | (0.93) |        |         |
| rio_disp      |         |         |         |        |        |        |         |         |        |         |        |         |        | 1.48   |         |
|               |         |         |         |        |        |        |         |         |        |         |        |         |        | (0.41) |         |
| rio_idiorisk  |         |         |         |        |        |        |         |         |        |         |        |         |        |        | -3.33   |
|               |         |         |         |        |        |        |         |         |        |         |        |         |        |        | (-0.72) |

| (Percentage)    | (121)            | (122)          | (123)            | (124)            | (125)            | (126)            | (127)          | (128)            | (129)            | (130)            | (131)          | (132)            | (133)            | (134)          | (135)          |
|-----------------|------------------|----------------|------------------|------------------|------------------|------------------|----------------|------------------|------------------|------------------|----------------|------------------|------------------|----------------|----------------|
| mktrf           | 3.67<br>(1.34)   | 3.65<br>(1.34) | 3.61<br>(1.28)   | 3.43<br>(1.28)   | 3.64<br>(1.34)   | 3.42<br>(1.25)   | 3.69<br>(1.36) | 3.31<br>(1.20)   | 3.47<br>(1.29)   | 3.99<br>(1.44)   | 3.56<br>(1.26) | 3.78<br>(1.30)   | 3.64<br>(1.25)   | 3.60<br>(1.32) | 3.66<br>(1.35) |
| rio_turnover    | -0.25<br>(-0.10) |                |                  |                  |                  |                  |                |                  |                  |                  |                |                  |                  |                |                |
| revenuesurprise |                  | 0.65<br>(0.09) |                  |                  |                  |                  |                |                  |                  |                  |                |                  |                  |                |                |
| roe             |                  |                | -0.13<br>(-0.03) |                  |                  |                  |                |                  |                  |                  |                |                  |                  |                |                |
| seo             |                  |                |                  | -5.47<br>(-1.38) |                  |                  |                |                  |                  |                  |                |                  |                  |                |                |
| sp              |                  |                |                  |                  | -0.08<br>(-0.03) |                  |                |                  |                  |                  |                |                  |                  |                |                |
| shareiss1y      |                  |                |                  |                  |                  | -2.31<br>(-0.58) |                |                  |                  |                  |                |                  |                  |                |                |
| shareiss5y      |                  |                |                  |                  |                  |                  | 4.21<br>(0.63) |                  |                  |                  |                |                  |                  |                |                |
| sharerepurchase |                  |                |                  |                  |                  |                  |                | -3.73<br>(-0.62) |                  |                  |                |                  |                  |                |                |
| sharevol        |                  |                |                  |                  |                  |                  |                |                  | -3.47<br>(-1.22) |                  |                |                  |                  |                |                |
| shortinterest   |                  |                |                  |                  |                  |                  |                |                  |                  | -1.66<br>(-0.61) |                |                  |                  |                |                |
| size            |                  |                |                  |                  |                  |                  |                |                  |                  |                  | 0.30<br>(0.10) |                  |                  |                |                |
| skew1           |                  |                |                  |                  |                  |                  |                |                  |                  |                  |                | -8.19<br>(-0.84) |                  |                |                |
| smileslope      |                  |                |                  |                  |                  |                  |                |                  |                  |                  |                |                  | -4.34<br>(-1.04) |                |                |
| spinoff         |                  |                |                  |                  |                  |                  |                |                  |                  |                  |                |                  |                  | 0.53<br>(0.15) |                |
| surpriserd      |                  |                |                  |                  |                  |                  |                |                  |                  |                  |                |                  |                  |                | 3.11<br>(0.52) |

| (Percentage)    | (136)   | (137)   | (138)  | (139)   | (140)   | (141)   | (142)   | (143)  | (144)   | (145)  | (146)   | (147)   | (148)   | (149)  | (150)  |
|-----------------|---------|---------|--------|---------|---------|---------|---------|--------|---------|--------|---------|---------|---------|--------|--------|
| mktrf           | 3.58    | 3.33    | 3.27   | 3.86    | 3.62    | 3.46    | 3.45    | 3.58   | 3.48    | 3.65   | 3.78    | 3.59    | 3.60    | 3.71   | 3.55   |
|                 | (1.29)  | (1.23)  | (1.19) | (1.41)  | (1.33)  | (1.26)  | (1.26)  | (1.31) | (1.29)  | (1.32) | (1.39)  | (1.32)  | (1.32)  | (1.34) | (1.31) |
| tax             | -0.59   |         |        |         |         |         |         |        |         |        |         |         |         |        |        |
|                 | (-0.10) |         |        |         |         |         |         |        |         |        |         |         |         |        |        |
| upforecast      |         | -11.79  |        |         |         |         |         |        |         |        |         |         |         |        |        |
|                 |         | (-1.09) |        |         |         |         |         |        |         |        |         |         |         |        |        |
| varcf           |         |         | 2.21   |         |         |         |         |        |         |        |         |         |         |        |        |
|                 |         |         | (0.86) |         |         |         |         |        |         |        |         |         |         |        |        |
| volmkt          |         |         |        | -1.88   |         |         |         |        |         |        |         |         |         |        |        |
|                 |         |         |        | (-0.72) |         |         |         |        |         |        |         |         |         |        |        |
| volsd           |         |         |        |         | -1.21   |         |         |        |         |        |         |         |         |        |        |
|                 |         |         |        |         | (-0.34) |         |         |        |         |        |         |         |         |        |        |
| volumetrend     |         |         |        |         |         | -3.12   |         |        |         |        |         |         |         |        |        |
|                 |         |         |        |         |         | (-0.54) |         |        |         |        |         |         |         |        |        |
| xfin            |         |         |        |         |         |         | -1.63   |        |         |        |         |         |         |        |        |
|                 |         |         |        |         |         |         | (-0.52) |        |         |        |         |         |         |        |        |
| zscore          |         |         |        |         |         |         |         | 1.11   |         |        |         |         |         |        |        |
|                 |         |         |        |         |         |         |         | (0.34) |         |        |         |         |         |        |        |
| cfp             |         |         |        |         |         |         |         |        | -3.47   |        |         |         |         |        |        |
|                 |         |         |        |         |         |         |         |        | (-1.05) |        |         |         |         |        |        |
| fgr5yrlag       |         |         |        |         |         |         |         |        |         | 0.11   |         |         |         |        |        |
|                 |         |         |        |         |         |         |         |        |         | (0.02) |         |         |         |        |        |
| grcapx          |         |         |        |         |         |         |         |        |         |        | -6.34   |         |         |        |        |
|                 |         |         |        |         |         |         |         |        |         |        | (-0.85) |         |         |        |        |
| hire            |         |         |        |         |         |         |         |        |         |        |         | -3.07   |         |        |        |
|                 |         |         |        |         |         |         |         |        |         |        |         | (-0.54) |         |        |        |
| pchdepr         |         |         |        |         |         |         |         |        |         |        |         |         | -2.88   |        |        |
|                 |         |         |        |         |         |         |         |        |         |        |         |         | (-0.35) |        |        |
| realestate      |         |         |        |         |         |         |         |        |         |        |         |         |         | 1.15   |        |
|                 |         |         |        |         |         |         |         |        |         |        |         |         |         | (0.13) |        |
| retconglomerate |         |         |        |         |         |         |         |        |         |        |         |         |         |        | 1.58   |
|                 |         |         |        |         |         |         |         |        |         |        |         |         |         |        | (0.47) |

| (Percentage) | (151)  | (152)  | (153)   | (154)  | (155)   |
|--------------|--------|--------|---------|--------|---------|
| mktrf        | 2.78   | 3.60   | 3.69    | 3.51   | 4.43    |
|              | (1.02) | (1.32) | (1.36)  | (1.29) | (1.38)  |
| sfe          | 4.26   |        |         |        |         |
|              | (1.64) |        |         |        |         |
| sinalgo      |        | 1.49   |         |        |         |
|              |        | (0.43) |         |        |         |
| std_turn     |        |        | -2.20   |        |         |
|              |        |        | (-0.91) |        |         |
| tang         |        |        |         | 0.96   |         |
|              |        |        |         | (0.70) |         |
| zerotrade    |        |        |         |        | -1.55   |
|              |        |        |         |        | (-0.51) |

**Table A.28: Other Predictors**

This table reports results of predicting next month coin market returns with the existing equity risk premium predictors. pd is the price-dividend ratio. pe is the price-earning ratio. credit is the credit spread. term is the term spread. tbill is the relative bill rate. \*, \*\*, \*\*\* denote significance levels at the 10%, 5%, and 1%. The data frequency is monthly.

| CMKT      | (1)            | (2)              | (3)              | (4)              | (5)            | (6)              | Ethereum  | (1)              | (2)            | (3)              | (4)              | (5)              | (6)              |
|-----------|----------------|------------------|------------------|------------------|----------------|------------------|-----------|------------------|----------------|------------------|------------------|------------------|------------------|
| pd        | 0.01<br>(0.52) |                  |                  |                  |                | -0.00<br>(-0.16) | pd        | -0.04<br>(-1.43) |                |                  |                  |                  | -0.01<br>(-0.20) |
| pe        |                | -0.03<br>(-1.16) |                  |                  |                | -0.01<br>(-0.49) | pe        |                  | 0.08<br>(0.84) |                  |                  |                  | -0.03<br>(-0.28) |
| credit    |                |                  | -0.16<br>(-0.55) |                  |                | -0.13<br>(-0.34) | credit    |                  |                | 0.20<br>(0.51)   |                  |                  | -0.60<br>(-0.94) |
| term      |                |                  |                  | 0.24**<br>(2.12) |                | 0.19<br>(1.28)   | term      |                  |                |                  | 0.45**<br>(2.13) |                  | 0.69*<br>(1.82)  |
| tbill     |                |                  |                  |                  | 0.28<br>(1.05) | 0.28<br>(0.97)   | tbill     |                  |                |                  |                  | -0.13<br>(-0.31) | -0.44<br>(-0.78) |
| R-squared | 0.00           | 0.01             | 0.00             | 0.05             | 0.01           | 0.06             | R-squared | 0.05             | 0.02           | 0.01             | 0.10             | 0.00             | 0.16             |
| Bitcoin   | (1)            | (2)              | (3)              | (4)              | (5)            | (6)              | Ripple    | (1)              | (2)            | (3)              | (4)              | (5)              | (6)              |
| pd        | 0.01<br>(0.54) |                  |                  |                  |                | -0.00<br>(-0.08) | pd        | 0.03<br>(0.52)   |                |                  |                  |                  | -0.04<br>(-0.42) |
| pe        |                | -0.03<br>(-1.36) |                  |                  |                | -0.02<br>(-0.58) | pe        |                  | 0.03<br>(0.37) |                  |                  |                  | 0.07<br>(0.60)   |
| credit    |                |                  | -0.12<br>(-0.43) |                  |                | -0.08<br>(-0.22) | credit    |                  |                | -0.97<br>(-1.32) |                  |                  | -1.51<br>(-1.37) |
| term      |                |                  |                  | 0.24**<br>(2.29) |                | 0.19<br>(1.35)   | term      |                  |                |                  | -0.04<br>(-0.14) |                  | 0.02<br>(0.04)   |
| tbill     |                |                  |                  |                  | 0.27<br>(1.08) | 0.28<br>(1.03)   | tbill     |                  |                |                  |                  | 0.09<br>(0.12)   | -0.25<br>(-0.30) |
| R-squared | 0.00           | 0.02             | 0.00             | 0.05             | 0.01           | 0.07             | R-squared | 0.00             | 0.00           | 0.03             | 0.00             | 0.00             | 0.04             |



**Table A.29: Detailed U.S. SIC 3-digit Industry Exposures to Coin Market Returns**

This table reports the results of regressing industry returns on the contemporaneous coin market returns and the stock market returns. The industry returns are calculated at the SIC three digit level. \*, \*\*, \*\*\* denote significance levels at the 10%, 5%, and 1%. The data frequency is monthly.

| SIC CODE | 0                 | 11                | 17                 | 18                 | 19                 | 20                 | 25                | 70                | 72                | 74                | 76                | 78                 | 83                | 91                | 99                 |
|----------|-------------------|-------------------|--------------------|--------------------|--------------------|--------------------|-------------------|-------------------|-------------------|-------------------|-------------------|--------------------|-------------------|-------------------|--------------------|
| CMKT     | -1.99<br>(-1.49)  | -0.76<br>(-0.62)  | -0.94<br>(-0.73)   | -0.81<br>(-0.75)   | 1.34<br>(0.89)     | 0.72<br>(0.11)     | -1.65<br>(-1.55)  | -0.18<br>(-0.17)  | -0.56<br>(-0.61)  | -1.08<br>(-1.15)  | 0.71<br>(0.34)    | -2.93<br>(-0.68)   | -3.82*<br>(-2.01) | -0.03<br>(-0.01)  | -2.51<br>(-1.25)   |
| MKTRF    | 1.88***<br>(5.67) | 1.05***<br>(3.75) | 1.38***<br>(4.66)  | 1.00***<br>(4.03)  | 1.47***<br>(4.24)  | 2.31**<br>(2.11)   | 0.64**<br>(2.63)  | 0.76***<br>(3.09) | 1.16***<br>(5.45) | 1.40***<br>(6.54) | 2.09***<br>(4.33) | 1.00**<br>(2.26)   | 1.21<br>(1.64)    | 0.21<br>(0.54)    | 2.32***<br>(4.11)  |
| SIC CODE | 100               | 101               | 102                | 103                | 104                | 106                | 107               | 108               | 109               | 122               | 124               | 131                | 132               | 138               | 140                |
| CMKT     | -0.65<br>(-0.47)  | -1.20<br>(-0.82)  | -2.42*<br>(-1.83)  | -3.13**<br>(-2.55) | -1.31<br>(-0.82)   | -6.16**<br>(-2.16) | -0.16<br>(-0.06)  | 1.87<br>(0.88)    | -0.68<br>(-0.56)  | -1.12<br>(-0.82)  | 1.93<br>(0.43)    | -1.03<br>(-1.35)   | -0.84<br>(-0.72)  | -1.39<br>(-1.61)  | 1.66<br>(0.70)     |
| MKTRF    | 1.57***<br>(4.90) | 1.61***<br>(4.76) | 1.72***<br>(5.64)  | 1.67***<br>(5.93)  | 0.53<br>(1.44)     | 2.33***<br>(3.55)  | 2.81***<br>(3.96) | 1.55***<br>(3.17) | 2.05***<br>(7.34) | 1.58***<br>(5.02) | 2.87***<br>(3.04) | 1.50***<br>(8.59)  | 1.71***<br>(6.40) | 1.61***<br>(8.11) | 0.97*<br>(1.77)    |
| SIC CODE | 141               | 142               | 144                | 147                | 148                | 149                | 152               | 153               | 154               | 160               | 161               | 162                | 170               | 171               | 173                |
| CMKT     | 2.30<br>(1.28)    | -2.28<br>(-1.34)  | -0.53<br>(-0.54)   | -0.20<br>(-0.20)   | 0.13<br>(0.02)     | -1.02<br>(-0.70)   | -0.91<br>(-0.84)  | -0.06<br>(-0.08)  | -1.04<br>(-0.82)  | -0.68<br>(-0.50)  | -1.93<br>(-0.46)  | -1.20*<br>(-1.75)  | -3.77<br>(-0.89)  | -1.24<br>(-1.08)  | -0.73<br>(-1.33)   |
| MKTRF    | 1.05**<br>(2.53)  | 1.44***<br>(4.04) | 1.13***<br>(5.90)  | 0.88***<br>(3.81)  | 1.54*<br>(1.94)    | 1.13***<br>(3.35)  | 1.73***<br>(6.96) | 1.42***<br>(8.21) | 2.46***<br>(8.42) | 1.35***<br>(4.34) | 4.00***<br>(4.17) | 1.71***<br>(10.87) | 1.74*<br>(1.78)   | 1.58***<br>(6.00) | 0.92***<br>(7.24)  |
| SIC CODE | 174               | 175               | 178                | 179                | 200                | 201                | 202               | 203               | 204               | 205               | 206               | 207                | 208               | 209               | 210                |
| CMKT     | -0.04<br>(-0.01)  | -1.79<br>(-0.40)  | -3.42**<br>(-1.99) | 1.32<br>(0.79)     | 0.34<br>(0.37)     | 0.60<br>(0.90)     | 0.82<br>(1.00)    | -0.41<br>(-0.75)  | 0.25<br>(0.54)    | -0.24<br>(-0.35)  | 1.02<br>(1.47)    | -0.15<br>(-0.27)   | 0.42<br>(0.96)    | 1.36<br>(1.04)    | 296.69*<br>(1.84)  |
| MKTRF    | 0.78<br>(1.60)    | 4.72***<br>(4.64) | 0.82**<br>(2.08)   | 1.67***<br>(4.22)  | 0.56***<br>(2.67)  | 0.50***<br>(3.26)  | 0.95***<br>(4.98) | 0.41***<br>(3.34) | 0.50***<br>(4.75) | 0.64***<br>(4.07) | 0.41**<br>(2.59)  | 0.78***<br>(6.07)  | 0.54***<br>(5.38) | 0.47<br>(1.57)    | -14.00*<br>(-1.98) |
| SIC CODE | 211               | 213               | 220                | 221                | 222                | 225                | 227               | 228               | 229               | 230               | 231               | 232                | 233               | 234               | 238                |
| CMKT     | -0.09<br>(-0.14)  | 0.48<br>(0.19)    | 2.97<br>(0.27)     | 0.12<br>(0.13)     | -0.82<br>(-1.04)   | 0.16<br>(0.17)     | -0.22<br>(-0.31)  | 1.18<br>(0.90)    | 0.46<br>(0.28)    | 0.56<br>(0.37)    | 11.45**<br>(2.19) | 0.27<br>(0.47)     | 1.81*<br>(1.92)   | -0.42<br>(-0.45)  | 1.57<br>(0.91)     |
| MKTRF    | 0.54***<br>(3.81) | 0.21<br>(0.18)    | -0.53<br>(-0.21)   | 0.62***<br>(3.06)  | 1.82***<br>(10.07) | 1.07***<br>(5.05)  | 1.38***<br>(8.44) | 1.01***<br>(3.32) | 1.28***<br>(3.37) | 0.20<br>(0.56)    | 2.36**<br>(2.29)  | 0.76***<br>(5.83)  | 1.12***<br>(5.16) | 0.65***<br>(3.07) | 1.23***<br>(3.08)  |

|          |         |         |         |         |         |         |         |         |         |         |         |         |         |         |          |
|----------|---------|---------|---------|---------|---------|---------|---------|---------|---------|---------|---------|---------|---------|---------|----------|
| SIC CODE | 241     | 242     | 243     | 245     | 249     | 250     | 251     | 252     | 253     | 254     | 261     | 262     | 263     | 265     | 267      |
| CMKT     | -1.91   | -1.91** | 0.23    | 0.33    | -0.10   | -1.68   | 1.85*   | -0.47   | 0.57    | -0.09   | -0.58   | -0.34   | -0.21   | -1.01   | 0.27     |
|          | (-0.77) | (-2.06) | (0.24)  | (0.10)  | (-0.13) | (-1.04) | (1.85)  | (-0.51) | (0.78)  | (-0.08) | (-0.32) | (-0.69) | (-0.34) | (-1.58) | (0.46)   |
| MKTRF    | 1.24**  | 0.97*** | 1.77*** | 1.51**  | 1.71*** | 0.97**  | 1.35*** | 1.45*** | 1.42*** | 1.70*** | 1.43*** | 1.41*** | 1.32*** | 1.34*** | 0.43***  |
|          | (2.37)  | (4.57)  | (7.91)  | (2.06)  | (9.59)  | (2.61)  | (5.82)  | (6.81)  | (8.50)  | (5.87)  | (3.98)  | (12.42) | (9.49)  | (9.05)  | (3.15)   |
| SIC CODE | 271     | 272     | 273     | 274     | 275     | 276     | 277     | 278     | 279     | 280     | 281     | 282     | 283     | 284     | 285      |
| CMKT     | -0.49   | -0.03   | 0.39    | 0.15    | -0.47   | -0.32   | 2.15**  | -0.34   | -1.06   | 1.05    | -0.33   | -0.44   | 0.81**  | 0.77*   | -1.15**  |
|          | (-0.67) | (-0.03) | (0.66)  | (0.29)  | (-0.70) | (-0.33) | (2.28)  | (-0.45) | (-1.03) | (1.26)  | (-0.96) | (-0.79) | (2.15)  | (1.94)  | (-2.32)  |
| MKTRF    | 1.28*** | 1.60*** | 0.93*** | 0.94*** | 1.37*** | 1.08*** | 0.76*** | 1.45*** | 1.03*** | 1.06*** | 1.20*** | 1.66*** | 0.76*** | 0.44*** | 1.44***  |
|          | (7.61)  | (7.15)  | (6.70)  | (8.13)  | (8.82)  | (4.83)  | (3.50)  | (8.25)  | (4.34)  | (5.51)  | (15.11) | (12.95) | (8.73)  | (4.77)  | (12.65)  |
| SIC CODE | 286     | 287     | 289     | 291     | 295     | 299     | 301     | 302     | 305     | 306     | 308     | 310     | 311     | 314     | 316      |
| CMKT     | -0.43   | -0.46   | 0.41    | 0.13    | 0.03    | -0.40   | -0.60   | 0.99    | 1.59    | -0.38   | -0.52   | -0.13   | -2.96   | 1.05    | 0.13     |
|          | (-0.78) | (-0.75) | (0.47)  | (0.29)  | (0.03)  | (-0.48) | (-0.55) | (1.24)  | (0.74)  | (-0.56) | (-1.20) | (-0.17) | (-0.39) | (1.11)  | (0.07)   |
| MKTRF    | 1.52*** | 1.37*** | 1.22*** | 1.06*** | 1.58*** | 0.74*** | 1.77*** | 0.56*** | 1.12**  | 1.27*** | 1.15*** | 0.77*** | 1.60    | 0.75*** | 1.47***  |
|          | (12.04) | (9.55)  | (6.15)  | (9.96)  | (6.37)  | (3.88)  | (7.09)  | (3.04)  | (2.48)  | (8.09)  | (11.51) | (4.39)  | (0.85)  | (3.45)  | (3.74)   |
| SIC CODE | 317     | 319     | 322     | 323     | 324     | 325     | 326     | 327     | 329     | 331     | 332     | 333     | 334     | 335     | 336      |
| CMKT     | -3.18   | 5.64    | -0.32   | 0.63    | -0.33   | -3.36   | 2.10    | -2.29** | -0.37   | -0.88   | 0.28    | -0.81   | -0.82   | -0.46   | -0.21    |
|          | (-1.00) | (1.49)  | (-0.35) | (0.55)  | (-0.33) | (-1.18) | (0.26)  | (-2.12) | (-0.41) | (-0.94) | (0.41)  | (-0.72) | (-0.43) | (-0.71) | (-0.27)  |
| MKTRF    | 1.64*   | 0.07    | 1.87*** | 1.66*** | 1.91*** | 2.17*** | 0.52    | 2.00*** | 1.43*** | 2.01*** | 0.68*** | 1.44*** | 2.07*** | 1.52*** | 1.08***  |
|          | (1.83)  | (0.18)  | (8.83)  | (6.24)  | (8.32)  | (3.29)  | (0.63)  | (8.07)  | (6.92)  | (9.37)  | (4.38)  | (5.55)  | (4.55)  | (10.29) | (6.11)   |
| SIC CODE | 339     | 341     | 342     | 343     | 344     | 345     | 346     | 347     | 348     | 349     | 351     | 352     | 353     | 354     | 355      |
| CMKT     | 1.71    | 0.16    | -1.01*  | 0.40    | -0.01   | 0.74    | 1.64    | 0.46    | 0.84    | -1.40** | -0.35   | -0.94   | -0.76   | -0.31   | -1.81*** |
|          | (0.32)  | (0.34)  | (-1.71) | (0.25)  | (-0.04) | (0.65)  | (1.23)  | (0.45)  | (0.84)  | (-2.38) | (-0.59) | (-1.32) | (-0.99) | (-0.56) | (-2.93)  |
| MKTRF    | 0.91    | 1.14*** | 1.46*** | 0.68*   | 1.29*** | 0.85*** | 2.15*** | 1.19*** | 0.60**  | 1.62*** | 1.11*** | 1.18*** | 1.44*** | 1.43*** | 1.53***  |
|          | (0.78)  | (10.37) | (10.74) | (1.84)  | (13.69) | (3.24)  | (6.98)  | (4.99)  | (2.63)  | (11.95) | (8.21)  | (7.19)  | (8.10)  | (11.43) | (10.76)  |

|          |         |         |         |         |         |         |         |         |         |         |         |         |         |         |         |
|----------|---------|---------|---------|---------|---------|---------|---------|---------|---------|---------|---------|---------|---------|---------|---------|
| SIC CODE | 356     | 357     | 358     | 359     | 360     | 361     | 362     | 363     | 364     | 365     | 366     | 367     | 369     | 371     | 372     |
| CMKT     | -0.58   | 0.12    | -0.41   | -1.13   | 0.83    | 1.01*   | -0.73   | -0.51   | -0.65   | -1.24   | 0.65    | -0.61   | 0.37    | -0.65   | 0.31    |
|          | (-1.26) | (0.19)  | (-0.73) | (-1.45) | (0.77)  | (1.76)  | (-1.51) | (-0.62) | (-1.14) | (-1.45) | (1.00)  | (-1.37) | (0.99)  | (-1.22) | (0.85)  |
| MKTRF    | 1.40*** | 1.05*** | 1.32*** | 1.70*** | 1.56*** | 1.23*** | 1.39*** | 1.49*** | 1.20*** | 1.75*** | 1.19*** | 1.22*** | 1.13*** | 1.50*** | 1.06*** |
|          | (13.02) | (7.21)  | (10.16) | (9.47)  | (6.24)  | (9.34)  | (12.48) | (7.88)  | (9.13)  | (8.94)  | (7.93)  | (11.88) | (13.05) | (12.31) | (12.53) |
| SIC CODE | 373     | 374     | 375     | 376     | 379     | 381     | 382     | 384     | 385     | 386     | 387     | 391     | 393     | 394     | 395     |
| CMKT     | -0.35   | -0.68   | -0.96   | 0.69    | 0.03    | 0.10    | 0.01    | 0.28    | 0.49    | 0.27    | -0.92   | 2.69*   | 1.61    | 0.34    | 0.55    |
|          | (-0.42) | (-0.77) | (-1.01) | (0.87)  | (0.03)  | (0.25)  | (0.03)  | (0.82)  | (0.69)  | (0.38)  | (-0.53) | (1.69)  | (1.32)  | (0.52)  | (0.32)  |
| MKTRF    | 0.97*** | 1.71*** | 1.00*** | 0.36*   | 1.37*** | 0.86*** | 1.18*** | 0.90*** | 0.35**  | 0.99*** | 1.68*** | 0.82**  | 1.43*** | 0.87*** | 0.59    |
|          | (4.98)  | (8.40)  | (4.58)  | (1.98)  | (5.30)  | (8.99)  | (13.38) | (11.47) | (2.15)  | (5.87)  | (4.17)  | (2.23)  | (5.08)  | (5.79)  | (1.21)  |
| SIC CODE | 396     | 397     | 399     | 401     | 421     | 422     | 440     | 441     | 442     | 444     | 448     | 449     | 451     | 452     | 458     |
| CMKT     | 0.44    | 0.03    | -0.09   | 0.41    | 0.02    | -1.10   | -0.91   | -0.80   | 1.80    | -0.07   | -0.36   | -1.42   | 0.55    | 0.03    | 0.45    |
|          | (0.12)  | (0.02)  | (-0.14) | (0.78)  | (0.04)  | (-0.59) | (-0.49) | (-1.19) | (0.45)  | (-0.08) | (-0.46) | (-1.04) | (0.86)  | (0.03)  | (0.55)  |
| MKTRF    | -0.49   | 1.87*** | 1.45*** | 1.11*** | 0.98*** | 0.92    | 1.76*** | 1.53*** | 2.68*** | 1.08*** | 0.74*** | 1.92*** | 0.99*** | 1.61*** | 0.63*** |
|          | (-0.59) | (4.33)  | (10.64) | (9.12)  | (8.57)  | (1.20)  | (4.09)  | (9.90)  | (4.05)  | (5.26)  | (4.12)  | (6.11)  | (6.63)  | (7.52)  | (3.33)  |
| SIC CODE | 461     | 472     | 473     | 474     | 478     | 481     | 482     | 483     | 484     | 489     | 491     | 492     | 493     | 494     | 495     |
| CMKT     | 0.14    | -3.51   | -0.10   | -0.64   | -4.58** | 0.01    | -1.85*  | 0.12    | 0.60    | 0.50    | 0.18    | -0.08   | -0.12   | -0.37   | 0.43    |
|          | (0.24)  | (-1.51) | (-0.16) | (-0.64) | (-2.29) | (0.01)  | (-1.95) | (0.28)  | (1.44)  | (1.12)  | (0.36)  | (-0.15) | (-0.23) | (-0.69) | (1.10)  |
| MKTRF    | 0.80*** | 0.44    | 0.88*** | 1.19*** | 1.68*** | 0.56*** | 0.92*** | 1.33*** | 1.05*** | 0.63*** | 0.25**  | 0.88*** | 0.22*   | 0.40*** | 0.47*** |
|          | (5.86)  | (0.74)  | (6.23)  | (4.15)  | (4.15)  | (5.66)  | (4.21)  | (13.10) | (10.95) | (6.08)  | (2.19)  | (7.29)  | (1.87)  | (3.22)  | (5.21)  |
| SIC CODE | 501     | 502     | 503     | 504     | 505     | 506     | 507     | 508     | 509     | 511     | 512     | 513     | 514     | 515     | 516     |
| CMKT     | -0.14   | -1.42   | -0.69   | 0.20    | -1.13   | -0.41   | -0.63   | -0.58   | 0.71    | -0.92   | 0.98    | -0.18   | 0.63    | -0.62   | -0.33   |
|          | (-0.32) | (-0.78) | (-1.04) | (0.48)  | (-1.53) | (-1.05) | (-0.87) | (-0.91) | (1.07)  | (-0.67) | (1.57)  | (-0.17) | (1.44)  | (-0.81) | (-0.50) |
| MKTRF    | 1.05*** | 1.35*** | 1.49*** | 1.01*** | 1.70*** | 1.23*** | 1.00*** | 0.92*** | 1.08*** | 1.32*** | 0.88*** | 1.03*** | 0.63*** | 1.21*** | 1.48*** |
|          | (10.49) | (3.20)  | (9.85)  | (10.46) | (10.02) | (13.87) | (5.95)  | (6.22)  | (7.02)  | (4.20)  | (6.06)  | (4.15)  | (6.20)  | (6.80)  | (9.75)  |

|          |         |         |         |         |         |         |         |         |         |         |         |         |         |         |         |
|----------|---------|---------|---------|---------|---------|---------|---------|---------|---------|---------|---------|---------|---------|---------|---------|
| SIC CODE | 517     | 518     | 519     | 520     | 521     | 523     | 531     | 533     | 539     | 541     | 544     | 546     | 549     | 551     | 552     |
| CMKT     | -0.46   | 0.50    | -1.30   | -1.29   | -1.21** | -0.98   | 0.39    | 0.47    | -1.12   | -0.71   | 0.20    | -0.01   | 3.24*** | -0.30   | 0.16    |
|          | (-0.73) | (0.80)  | (-1.31) | (-1.47) | (-2.27) | (-1.23) | (0.46)  | (0.94)  | (-0.42) | (-0.92) | (0.33)  | (-0.01) | (2.65)  | (-0.33) | (0.14)  |
| MKTRF    | 1.21*** | 0.58*** | 1.41*** | 0.99*** | 1.07*** | 0.91*** | 0.83*** | 0.46*** | 0.97    | 0.79*** | 0.67*** | 0.83*   | 0.86*** | 1.38*** | 1.55*** |
|          | (8.28)  | (3.21)  | (6.16)  | (4.86)  | (8.72)  | (4.75)  | (4.19)  | (3.96)  | (1.33)  | (4.44)  | (4.73)  | (1.76)  | (3.05)  | (6.57)  | (6.09)  |
| SIC CODE | 553     | 554     | 555     | 560     | 561     | 562     | 563     | 564     | 565     | 566     | 569     | 570     | 571     | 572     | 573     |
| CMKT     | -0.52   | 0.31    | -0.30   | -0.05   | 0.50    | 0.97    | 0.67    | -0.55   | 0.26    | -0.69   | -1.59   | 1.06    | 0.48    | 3.08    | 0.53    |
|          | (-0.73) | (0.47)  | (-0.24) | (-0.03) | (0.33)  | (0.92)  | (0.38)  | (-0.39) | (0.36)  | (-0.67) | (-1.02) | (1.04)  | (0.51)  | (0.85)  | (0.41)  |
| MKTRF    | 0.58*** | 0.68*** | 1.31*** | 0.86**  | 0.90**  | 0.96*** | 1.42*** | 1.09*** | 0.94*** | 0.92*** | 0.43    | 0.68*** | 1.31*** | 1.40*   | 1.09*** |
|          | (3.51)  | (4.48)  | (4.52)  | (2.61)  | (2.58)  | (3.95)  | (3.44)  | (3.34)  | (5.67)  | (3.90)  | (1.32)  | (2.90)  | (6.05)  | (1.67)  | (3.60)  |
| SIC CODE | 581     | 590     | 591     | 593     | 594     | 596     | 598     | 599     | 600     | 601     | 602     | 603     | 608     | 609     | 611     |
| CMKT     | 0.41    | 1.74    | 0.80    | 0.20    | -0.16   | -0.24   | 0.28    | -0.08   | -1.24   | -0.06   | -0.37   | -0.40   | -1.62   | -0.95   | -2.32*  |
|          | (1.10)  | (1.48)  | (1.31)  | (0.21)  | (-0.26) | (-0.28) | (0.15)  | (-0.15) | (-1.33) | (-0.06) | (-0.90) | (-0.90) | (-1.35) | (-1.36) | (-1.68) |
| MKTRF    | 0.57*** | 0.87*** | 0.88*** | 0.72*** | 1.48*** | 0.87*** | 1.76*** | 0.76*** | 1.04*** | 0.28    | 1.29*** | 0.98*** | 1.18*** | 1.09*** | 1.22*** |
|          | (6.66)  | (3.20)  | (6.21)  | (3.25)  | (10.14) | (4.40)  | (4.16)  | (5.79)  | (4.83)  | (1.21)  | (13.73) | (9.62)  | (3.77)  | (6.75)  | (3.83)  |
| SIC CODE | 614     | 615     | 616     | 619     | 620     | 621     | 622     | 623     | 628     | 630     | 631     | 632     | 633     | 635     | 636     |
| CMKT     | 0.41    | 0.78    | 0.22    | -1.16   | 0.21    | -0.76   | 0.33    | 1.29    | 0.18    | -0.44   | 0.12    | 0.72    | -0.51*  | 0.11    | 0.19    |
|          | (0.69)  | (1.53)  | (0.16)  | (-1.08) | (0.32)  | (-1.26) | (0.36)  | (1.30)  | (0.66)  | (-0.46) | (0.23)  | (1.45)  | (-1.83) | (0.20)  | (0.34)  |
| MKTRF    | 1.11*** | 0.96*** | 1.15*** | 0.99*** | 0.87*** | 1.69*** | 0.80*** | 1.08*** | 1.60*** | 0.85*** | 1.65*** | 0.88*** | 0.88*** | 1.48*** | 0.67*** |
|          | (8.17)  | (8.21)  | (3.55)  | (3.82)  | (5.83)  | (12.02) | (3.82)  | (4.74)  | (25.25) | (3.87)  | (13.28) | (7.75)  | (13.51) | (11.85) | (5.30)  |
| SIC CODE | 637     | 639     | 641     | 650     | 651     | 653     | 655     | 670     | 671     | 672     | 673     | 677     | 679     | 701     | 720     |
| CMKT     | -0.20   | 1.17    | -0.04   | -0.37   | 0.05    | -0.18   | -0.61   | -0.21   | -0.44   | -0.12   | -2.69** | -0.83   | -0.30   | -0.14   | -0.12   |
|          | (-0.26) | (1.33)  | (-0.10) | (-0.33) | (0.09)  | (-0.42) | (-0.79) | (-0.07) | (-0.87) | (-0.83) | (-2.34) | (-0.52) | (-0.67) | (-0.26) | (-0.09) |
| MKTRF    | 0.82*** | 0.98*** | 0.95*** | 0.49*   | 1.08*** | 1.45*** | 0.94*** | 0.95    | 1.33*** | 0.76*** | 1.65*** | 1.24*** | 0.81*** | 1.58*** | 0.86*** |
|          | (3.66)  | (4.84)  | (11.88) | (1.90)  | (9.11)  | (14.75) | (5.22)  | (1.30)  | (11.53) | (23.04) | (6.17)  | (3.37)  | (7.86)  | (12.82) | (2.98)  |

|          |         |         |         |         |         |         |         |         |         |         |         |         |         |         |         |
|----------|---------|---------|---------|---------|---------|---------|---------|---------|---------|---------|---------|---------|---------|---------|---------|
| SIC CODE | 721     | 723     | 726     | 728     | 729     | 731     | 732     | 733     | 734     | 735     | 736     | 737     | 738     | 751     | 753     |
| CMKT     | -0.86   | 0.08    | -0.52   | -0.98   | 1.44    | -0.39   | -0.22   | -1.63   | -0.45   | -0.65   | -0.75   | 0.01    | 0.09    | 0.53    | 0.71    |
|          | (-1.35) | (0.09)  | (-0.86) | (-0.72) | (1.07)  | (-0.80) | (-0.48) | (-1.28) | (-1.03) | (-0.97) | (-1.45) | (0.02)  | (0.26)  | (0.54)  | (0.66)  |
| MKTRF    | 1.06*** | 0.86*** | 1.05*** | 1.22*** | 1.67*** | 1.56*** | 1.10*** | 1.56*** | 0.71*** | 1.77*** | 1.61*** | 1.04*** | 1.05*** | 1.85*** | 0.75*** |
|          | (7.25)  | (4.12)  | (7.56)  | (3.37)  | (5.42)  | (13.94) | (10.40) | (5.32)  | (7.01)  | (11.53) | (13.57) | (13.48) | (12.47) | (8.26)  | (3.00)  |
| SIC CODE | 781     | 782     | 783     | 784     | 790     | 792     | 793     | 794     | 799     | 800     | 801     | 802     | 805     | 806     | 807     |
| CMKT     | -0.46   | 0.30    | -0.48   | 1.99    | -0.51   | -0.21   | 0.03    | 0.79    | 0.25    | -5.18*  | 0.34    | 1.34    | -0.28   | -0.43   | 0.13    |
|          | (-0.56) | (0.17)  | (-0.58) | (0.73)  | (-0.24) | (-0.22) | (0.07)  | (1.61)  | (0.39)  | (-1.76) | (0.40)  | (0.77)  | (-0.34) | (-0.47) | (0.21)  |
| MKTRF    | 1.13*** | 0.92**  | 1.06*** | 1.45**  | 0.58    | 1.18*** | 0.24**  | 0.89*** | 1.21*** | 0.58    | 0.62*** | -0.06   | 1.61*** | 1.11*** | 0.82*** |
|          | (6.07)  | (2.28)  | (5.57)  | (2.32)  | (1.14)  | (5.23)  | (2.08)  | (7.91)  | (8.24)  | (0.77)  | (3.21)  | (-0.15) | (8.40)  | (5.29)  | (6.06)  |
| SIC CODE | 808     | 809     | 820     | 821     | 822     | 823     | 824     | 829     | 830     | 832     | 835     | 836     | 869     | 870     | 871     |
| CMKT     | 1.60*   | 0.67    | -1.02   | 1.58    | -0.28   | 7.84    | -0.04   | 1.28    | -2.17   | -1.64   | -0.12   | 1.06    | -1.31   | 0.39    | -0.82*  |
|          | (1.94)  | (1.12)  | (-0.63) | (0.90)  | (-0.22) | (1.57)  | (-0.03) | (0.93)  | (-0.42) | (-1.04) | (-0.14) | (0.71)  | (-0.65) | (0.78)  | (-1.68) |
| MKTRF    | 0.79*** | 1.22*** | 1.38*** | 1.34*** | 1.31*** | 1.82*** | 1.29*** | 1.30*** | 0.39    | 1.14*** | 0.16    | 1.44*** | 1.57*** | 0.88*** | 1.39*** |
|          | (4.16)  | (8.79)  | (3.68)  | (3.33)  | (4.46)  | (3.41)  | (4.00)  | (4.11)  | (0.39)  | (3.12)  | (0.69)  | (4.21)  | (3.81)  | (7.62)  | (12.43) |
| SIC CODE | 872     | 873     | 874     | 891     | 899     | 943     | 951     | 961     | 999     |         |         |         |         |         |         |
| CMKT     | 0.41    | 0.80    | -0.10   | -0.14   | 0.45    | 0.83    | -2.92   | -2.47   | -0.39   |         |         |         |         |         |         |
|          | (0.44)  | (1.01)  | (-0.27) | (-0.09) | (0.31)  | (0.41)  | (-0.55) | (-1.62) | (-0.90) |         |         |         |         |         |         |
| MKTRF    | 1.10*** | 1.18*** | 0.97*** | 0.82**  | 1.22*** | 1.11**  | 2.83**  | 1.33*** | 1.16*** |         |         |         |         |         |         |
|          | (5.07)  | (6.49)  | (12.10) | (2.34)  | (3.69)  | (2.26)  | (2.61)  | (4.42)  | (11.53) |         |         |         |         |         |         |

**Table A.30: Industry Exposure to Coin Market Returns**

This table reports the results of regressing industry returns on the contemporaneous coin market returns and the stock market returns. The industry returns are calculated at Fama-French 30 industry level. \*, \*\*, \*\*\* denote significance levels at the 10%, 5%, and 1%. The data frequency is monthly.

|           |         |         |         |         |         |         |         |         |         |         |
|-----------|---------|---------|---------|---------|---------|---------|---------|---------|---------|---------|
| x100      | food    | beer    | smoke   | games   | books   | hshld   | clths   | hlth    | chems   | txtls   |
| CMKT      | 0.47    | 0.48    | 0.06    | 0.03    | -0.44   | 0.59    | 0.65    | 0.51    | -0.37   | 0.27    |
|           | (1.37)  | (1.16)  | (0.08)  | (0.05)  | (-0.97) | (1.64)  | (1.18)  | (1.52)  | (-1.02) | (0.45)  |
|           | [0.99]  | [1.07]  | [0.08]  | [0.11]  | [-0.82] | [2.12]  | [1.09]  | [1.77]  | [-1.10] | [0.52]  |
| MKTRF     | 0.58*** | 0.44*** | 0.54*** | 1.34*** | 1.22*** | 0.54*** | 0.78*** | 0.88*** | 1.34*** | 1.35*** |
|           | (8.33)  | (5.21)  | (3.74)  | (11.12) | (12.91) | (7.24)  | (6.84)  | (12.84) | (17.80) | (10.81) |
|           | [6.65]  | [4.15]  | [3.05]  | [7.40]  | [12.52] | [7.00]  | [6.40]  | [10.13] | [13.62] | [6.93]  |
| ALPHA     | 0.12    | 0.46    | 0.46    | 0.03    | -0.59*  | 0.08    | 0.21    | 0.28    | -0.30   | -0.29   |
|           | (0.48)  | (1.51)  | (0.88)  | (0.06)  | (-1.74) | (0.29)  | (0.52)  | (1.14)  | (-1.12) | (-0.64) |
|           | [0.32]  | [1.39]  | [0.78]  | [-0.02] | [-2.10] | [0.15]  | [0.49]  | [1.24]  | [-1.07] | [-0.64] |
| R-Squared | 0.4512  | 0.2504  | 0.1345  | 0.5768  | 0.6432  | 0.3928  | 0.3579  | 0.6560  | 0.7747  | 0.5662  |
| x100      | cnstr   | steel   | fabpr   | elceq   | autos   | carry   | mines   | coal    | oil     | util    |
| CMKT      | -0.50   | -0.40   | -0.83*  | -0.64   | -0.63   | 0.31    | -1.33   | -1.32   | -0.30   | 0.07    |
|           | (-1.21) | (-0.59) | (-1.81) | (-1.58) | (-1.15) | (0.84)  | (-1.45) | (-0.78) | (-0.52) | (0.15)  |
|           | [-1.17] | [-0.77] | [-1.76] | [-1.15] | [-1.60] | [1.01]  | [-1.97] | [-1.28] | [-1.02] | [0.12]  |
| MKTRF     | 1.44*** | 1.57*** | 1.43*** | 1.34*** | 1.34*** | 1.05*** | 1.17*** | 1.41*** | 1.22*** | 0.32*** |
|           | (16.78) | (11.19) | (15.14) | (15.90) | (11.73) | (13.75) | (6.13)  | (4.03)  | (10.10) | (3.59)  |
|           | [11.84] | [11.63] | [11.25] | [17.69] | [8.21]  | [15.22] | [5.77]  | [3.20]  | [9.57]  | [2.89]  |
| ALPHA     | -0.47   | -1.26** | -0.38   | -0.59*  | -0.61   | 0.27    | -1.21*  | -2.67** | -0.90** | 0.50    |
|           | (-1.52) | (-2.51) | (-1.13) | (-1.95) | (-1.49) | (0.98)  | (-1.76) | (-2.13) | (-2.08) | (1.53)  |
|           | [-1.32] | [-2.80] | [-1.14] | [-1.84] | [-1.65] | [0.82]  | [-1.75] | [-2.13] | [-2.25] | [1.57]  |
| R-Squared | 0.7530  | 0.5765  | 0.7115  | 0.7316  | 0.5974  | 0.6803  | 0.2892  | 0.1489  | 0.5254  | 0.1257  |
| x100      | telcm   | servs   | buseq   | paper   | trans   | whsl    | rtail   | meals   | fin     | other   |
| CMKT      | 0.15    | -0.17   | -0.09   | 0.18    | 0.31    | 0.20    | 0.17    | 0.41    | -0.07   | -0.15   |
|           | (0.40)  | (-0.63) | (-0.22) | (0.64)  | (0.76)  | (0.73)  | (0.52)  | (1.23)  | (-0.23) | (-0.52) |
|           | [0.31]  | [-0.69] | [-0.24] | [0.53]  | [1.27]  | [0.81]  | [0.62]  | [0.89]  | [-0.18] | [-0.57] |
| MKTRF     | 0.81*** | 1.02*** | 1.11*** | 1.07*** | 1.08*** | 1.03*** | 0.91*** | 0.66*** | 1.20*** | 0.85*** |
|           | (10.84) | (18.10) | (13.74) | (18.96) | (12.88) | (18.36) | (13.64) | (9.72)  | (18.91) | (13.84) |
|           | [9.36]  | [18.34] | [15.96] | [22.29] | [11.66] | [16.69] | [16.36] | [10.62] | [20.92] | [15.57] |
| ALPHA     | 0.15    | 0.28    | 0.09    | -0.15   | -0.07   | -0.22   | 0.34    | 0.45*   | -0.07   | 0.12    |
|           | (0.54)  | (1.37)  | (0.31)  | (-0.74) | (-0.23) | (-1.11) | (1.43)  | (1.83)  | (-0.29) | (0.54)  |
|           | [0.33]  | [1.43]  | [0.19]  | [-0.92] | [-0.33] | [-1.18] | [1.42]  | [1.80]  | [-0.45] | [0.41]  |
| R-Squared | 0.5672  | 0.7813  | 0.6743  | 0.8001  | 0.6512  | 0.7899  | 0.6749  | 0.5233  | 0.7969  | 0.6761  |

**Table A.31: Country Exposure to Coin Market Returns**

This table reports the results of regressing stock returns of different geographic areas on the contemporaneous coin market returns and the stock market returns. \*, \*\*, \*\*\* denote significance levels at the 10%, 5%, and 1%. The data frequency is monthly.

| x100      | U.S.A                      | Europe                    | Japan                    | AsiaExJapan              | North America             |
|-----------|----------------------------|---------------------------|--------------------------|--------------------------|---------------------------|
| CMKT      | 0.74<br>(1.50)<br>[1.29]   | 1.14*<br>(1.82)<br>[1.68] | 0.87<br>(1.65)<br>[1.18] | 0.43<br>(0.64)<br>[0.55] | 0.71<br>(1.42)<br>[1.20]  |
| ALPHA     | 0.76**<br>(2.10)<br>[2.45] | 0.17<br>(0.38)<br>[0.40]  | 0.31<br>(0.80)<br>[0.84] | 0.16<br>(0.33)<br>[0.30] | 0.68*<br>(1.86)<br>[2.10] |
| R-squared | 0.02                       | 0.03                      | 0.03                     | 0.00                     | 0.02                      |

**Table A.32: Regulative Events**

This table documents the date and direction of the cryptocurrency regulative events until the end of 2018.

| Date       | Direction | Date       | Direction | Date       | Direction | Date       | Direction |
|------------|-----------|------------|-----------|------------|-----------|------------|-----------|
| 11/03/2017 | Negative  | 03/01/2018 | Negative  | 28/02/2018 | Positive  | 12/07/2018 | Positive  |
| 01/06/2017 | Positive  | 05/01/2018 | Negative  | 01/03/2018 | Positive  | 19/07/2018 | Positive  |
| 06/06/2017 | Positive  | 09/01/2018 | Negative  | 02/03/2018 | Negative  | 26/07/2018 | Positive  |
| 26/07/2017 | Negative  | 11/01/2018 | Negative  | 07/03/2018 | Negative  | 27/07/2018 | Negative  |
| 01/08/2017 | Positive  | 15/01/2018 | Negative  | 07/03/2018 | Negative  | 15/08/2018 | Negative  |
| 08/08/2017 | Positive  | 15/01/2018 | Positive  | 08/03/2018 | Negative  | 22/08/2018 | Negative  |
| 17/08/2017 | Negative  | 16/01/2018 | Positive  | 13/03/2018 | Negative  | 23/08/2018 | Negative  |
| 22/08/2017 | Positive  | 19/01/2018 | Positive  | 13/03/2018 | Negative  | 05/09/2018 | Negative  |
| 04/09/2017 | Negative  | 22/01/2018 | Negative  | 14/03/2018 | Negative  | 11/09/2018 | Negative  |
| 07/09/2017 | Negative  | 25/01/2018 | Negative  | 16/03/2018 | Negative  | 11/09/2018 | Negative  |
| 08/09/2017 | Negative  | 25/01/2018 | Negative  | 19/03/2018 | Negative  | 18/09/2018 | Negative  |
| 14/09/2017 | Negative  | 29/01/2018 | Negative  | 20/03/2018 | Negative  | 19/09/2018 | Negative  |
| 15/09/2017 | Negative  | 30/01/2018 | Negative  | 22/03/2018 | Negative  | 25/09/2018 | Positive  |
| 29/09/2017 | Negative  | 30/01/2018 | Negative  | 22/03/2018 | Negative  | 26/09/2018 | Positive  |
| 29/09/2017 | Positive  | 31/01/2018 | Positive  | 26/03/2018 | Negative  | 15/10/2018 | Negative  |
| 10/10/2017 | Negative  | 31/01/2018 | Negative  | 27/03/2018 | Negative  | 19/10/2018 | Negative  |
| 15/10/2017 | Negative  | 01/02/2018 | Negative  | 05/04/2018 | Negative  | 24/10/2018 | Positive  |
| 24/10/2017 | Positive  | 05/02/2018 | Negative  | 05/04/2018 | Negative  | 25/10/2018 | Negative  |
| 04/12/2017 | Negative  | 05/02/2018 | Negative  | 05/04/2018 | Negative  | 29/10/2018 | Negative  |
| 04/12/2017 | Negative  | 06/02/2018 | Negative  | 17/04/2018 | Negative  | 05/11/2018 | Negative  |
| 11/12/2017 | Positive  | 08/02/2018 | Negative  | 22/04/2018 | Negative  | 07/11/2018 | Positive  |
| 12/12/2017 | Negative  | 13/02/2018 | Negative  | 23/04/2018 | Negative  | 14/11/2018 | Positive  |
| 13/12/2017 | Negative  | 13/02/2018 | Positive  | 27/04/2018 | Negative  | 15/11/2018 | Negative  |
| 14/12/2017 | Positive  | 16/02/2018 | Negative  | 28/04/2018 | Positive  | 17/11/2018 | Positive  |
| 16/12/2017 | Negative  | 20/02/2018 | Positive  | 24/05/2018 | Negative  | 19/11/2018 | Negative  |
| 18/12/2017 | Negative  | 21/02/2018 | Negative  | 01/06/2018 | Negative  | 14/12/2018 | Positive  |
| 20/12/2017 | Positive  | 21/02/2018 | Positive  | 14/06/2018 | Positive  | 07/01/2019 | Negative  |
| 22/12/2017 | Positive  | 22/02/2018 | Negative  | 18/06/2018 | Positive  | 14/02/2019 | Positive  |
| 28/12/2017 | Negative  | 27/02/2018 | Negative  | 22/06/2018 | Negative  | 20/02/2019 | Negative  |
| 02/01/2018 | Positive  | 28/02/2018 | Negative  | 26/06/2018 | Positive  | 26/02/2019 | Negative  |
